# Supplementary material for: Ten thousand hour stable zinc air batteries via Fe and W dual atom sites
Source: Springer Nature journal article supplement (doi:10.1038/s41467-025-63540-w), 2025-08-29
Supplement: MOESM1 [file 41467_2025_63540_MOESM1_ESM.pdf]

## Supplementary Information

### Ten Thousand Hour Stable Zinc Air Batteries via Fe and W Dual Atom Sites

Yifan Li<sup>1</sup>, Hanlin Wang<sup>1</sup>, Chang Chen<sup>2</sup>, Xuesong Xie<sup>1</sup>, Yang Yang<sup>1</sup>, Xuehai Tan<sup>1</sup>, Keren Jiang<sup>1</sup>, Ning Chen<sup>3</sup>, Hao Zhang<sup>1\*</sup>, Zhi Li<sup>1\*</sup>

<sup>1</sup>*Department of Chemical and Materials Engineering, University of Alberta, Edmonton, Alberta T6G 1H9, Canada*

<sup>2</sup>*Engineering Research Center of Advanced Rare Earth Materials, Department of Chemistry, Tsinghua University, Beijing, 100000, China*

<sup>3</sup>*Hard X-Ray Micro Analysis BL, Canadian Light Source Saskatoon, Saskatchewan, S7N 2V3 Canada*

Contents:

Supplementary Figure 1-46

Supplementary Table 1-7

Supplementary Reference 1-51

## Supplementary Figures

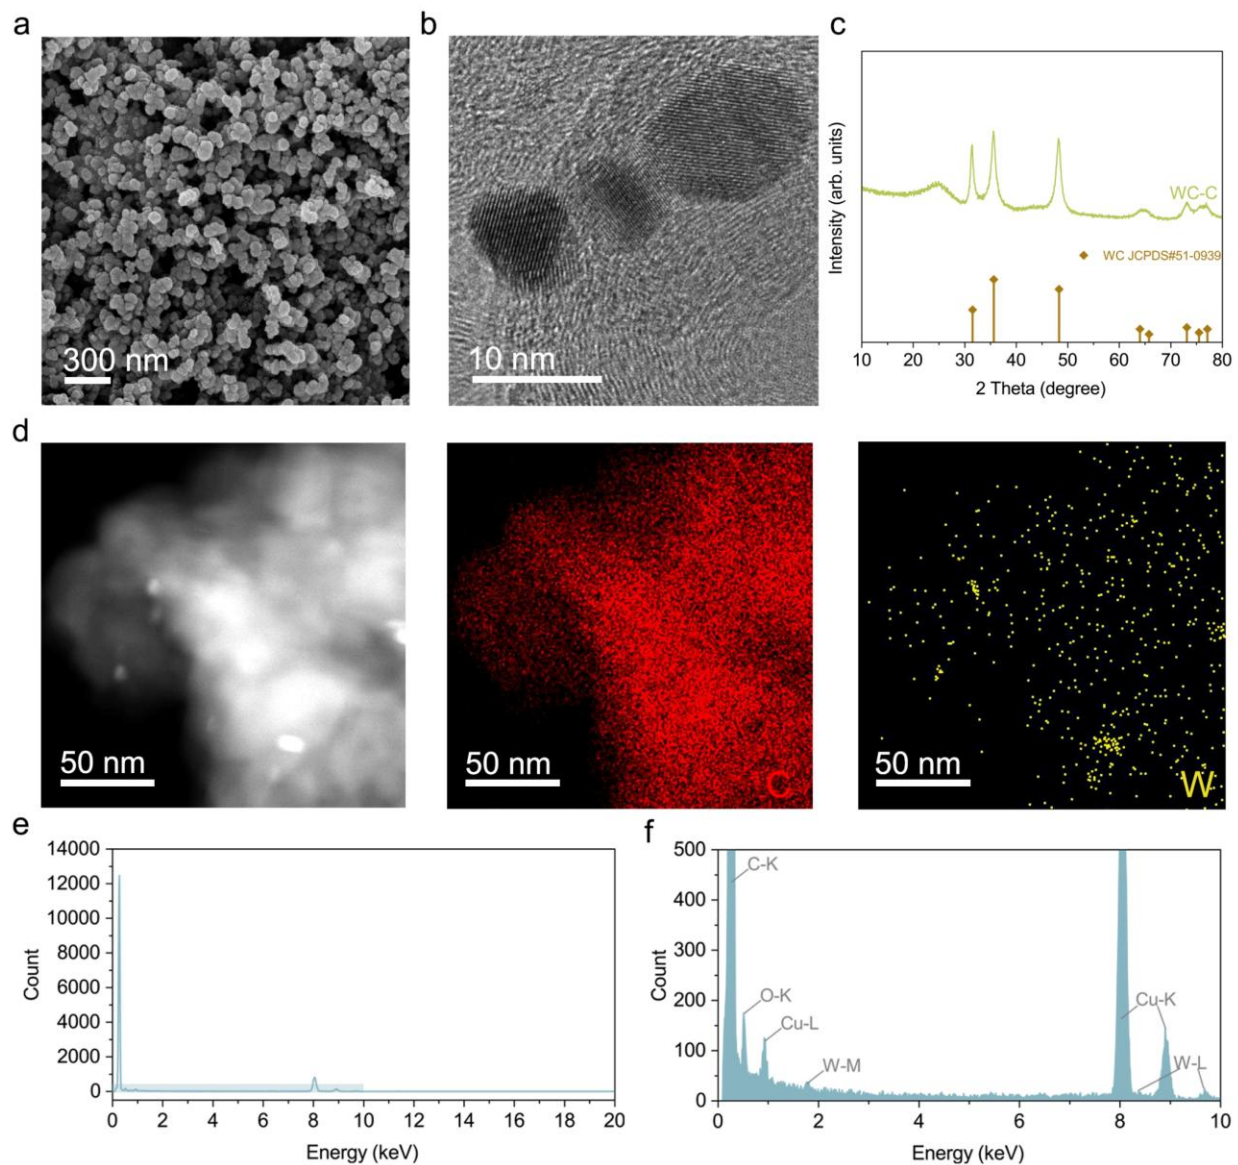

**Supplementary Fig. 1.** Morphological characterizations of WC-C catalyst. **a**, Scanning electron microscopy (SEM) image. **b**, Transmission electron microscopy (TEM) image. **c**, X-ray diffraction (XRD) pattern. **d**, High-angle annular dark-field scanning transmission electron microscopy (HAADF-STEM) image and corresponding energy-dispersive X-ray spectroscopy (EDX) mapping images for C (red) and W (yellow). **e**, Corresponding EDX spectrum. **f**, Enlarged EDX spectrum corresponding to the shaded area in (e).

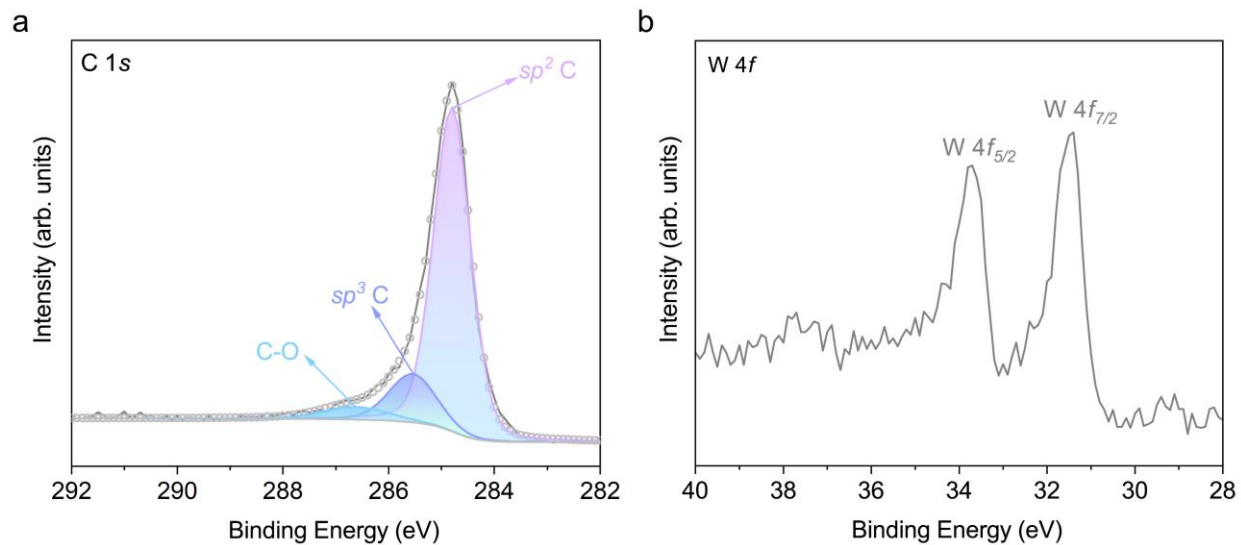

**Supplementary Fig. 2.** X-ray photoelectron spectroscopy (XPS) analysis of WC-C catalyst. **a**, High-resolution XPS spectrum of C 1s. **b**, High-resolution XPS spectrum of W 4f.

Notably, the WC-C catalyst exhibits W 4f<sub>5/2</sub> and W 4f<sub>7/2</sub> peaks at binding energies of 33.7 and 31.4 eV. The 4f<sub>7/2</sub> binding energy of W is about 0.8 eV higher than that of metallic W (30.6 eV), and the chemical shift of W 4f peaks attributed to the charge transfer from tungsten to carbon atoms upon WC compound formation<sup>1-3</sup>.

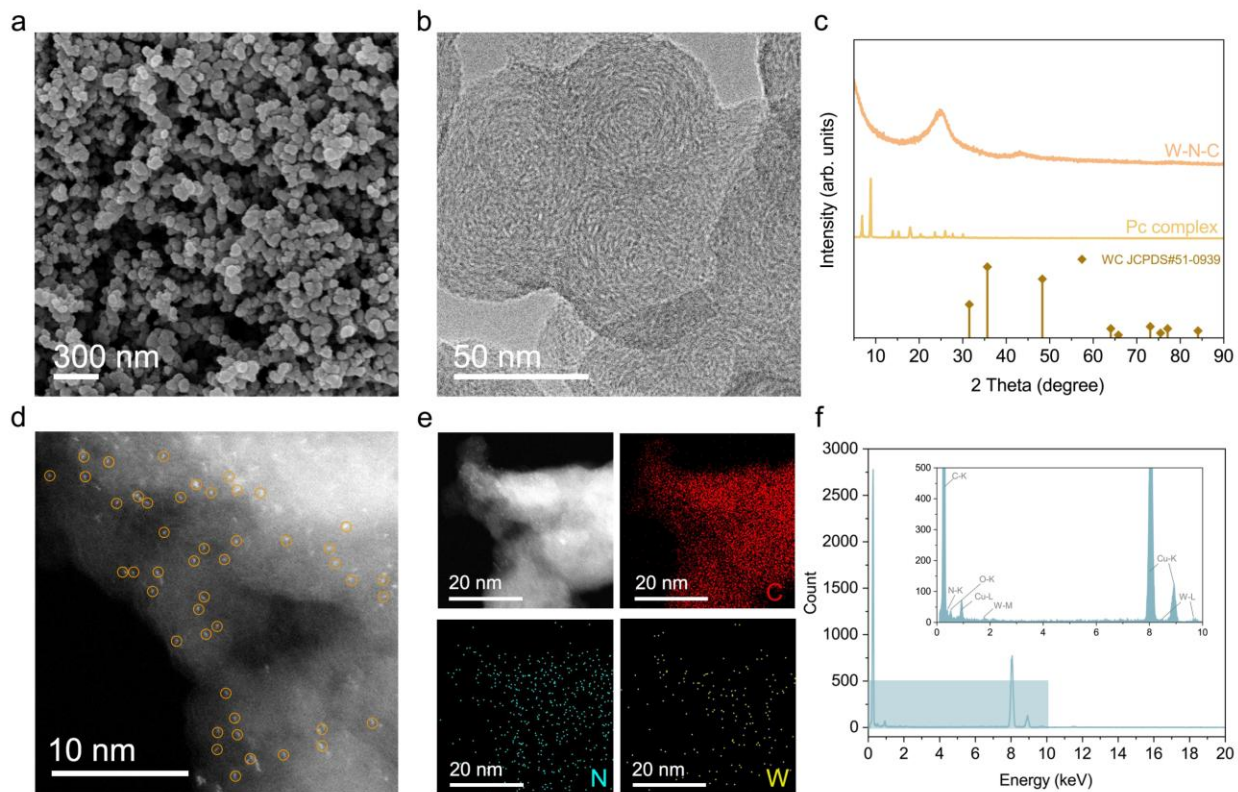

**Supplementary Fig. 3.** Morphological characterizations of W-N-C catalyst. **a**, SEM image. **b**, TEM image. **c**, XRD patterns of W-N-C catalyst and phthalocyanine crystalline complex (Pc complex). **d**, Aberration-corrected HAADF-STEM image. **e**, HAADF-STEM image and corresponding EDX mapping images for C (red), N (blue) and W (yellow). **f**, Corresponding EDX spectrum, and the inset is the enlarged EDX spectrum of the shaded area.

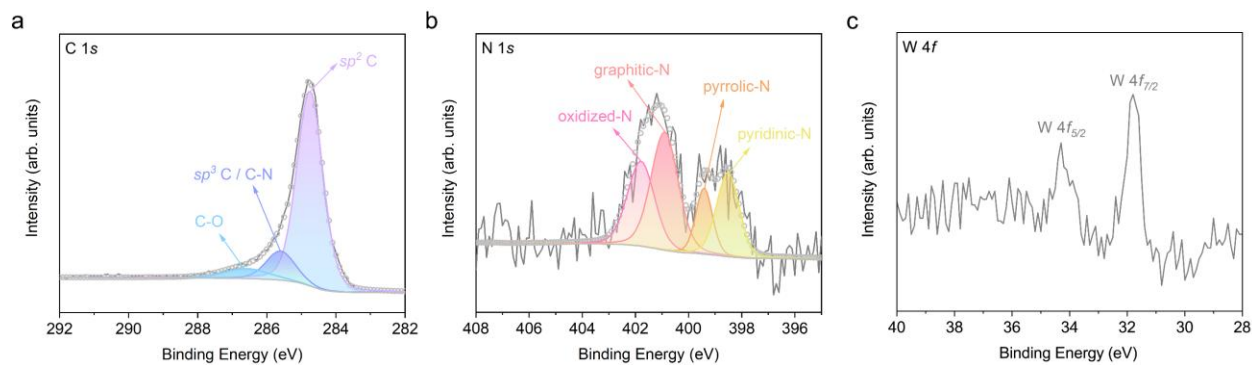

**Supplementary Fig. 4.** XPS analysis of W-N-C catalyst. **a**, High-resolution XPS spectrum of C 1s. **b**, High-resolution XPS spectrum of N 1s. **c**, High-resolution XPS spectrum of W 4f.

Notably, the W-N-C catalyst exhibits W 4f<sub>5/2</sub> and W 4f<sub>7/2</sub> peaks at binding energies of 34.3 and 31.8 eV. This could be attributed to the introduction of N atoms during the ball milling process, which forms W-N coordination on the carbon black surface. Since N has a stronger electronegativity than C, a larger chemical shift is generated by comparing with the WC-C catalyst<sup>4</sup>. Moreover, the binding energy of W 4f<sub>7/2</sub> in W-N-C catalyst is significantly lower than that of WO<sub>2</sub> (32.9 eV) and WO<sub>3</sub> (35.6 eV), proving the existence of W-N coordination<sup>4,5</sup>.

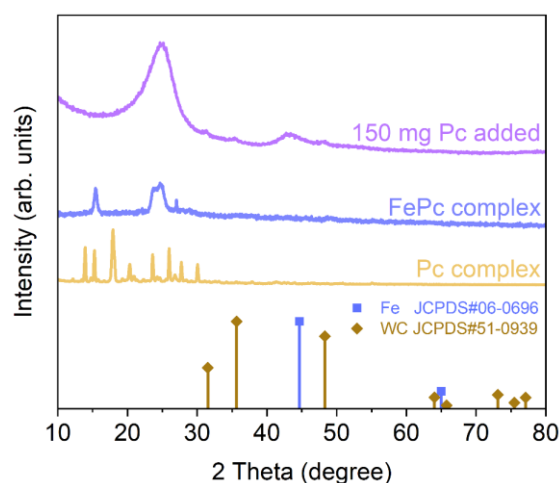

**Supplementary Fig. 5.** XRD patterns of Pc complex, FePc complex, and the catalyst prepared by adding 150 mg Pc during the ball milling process.

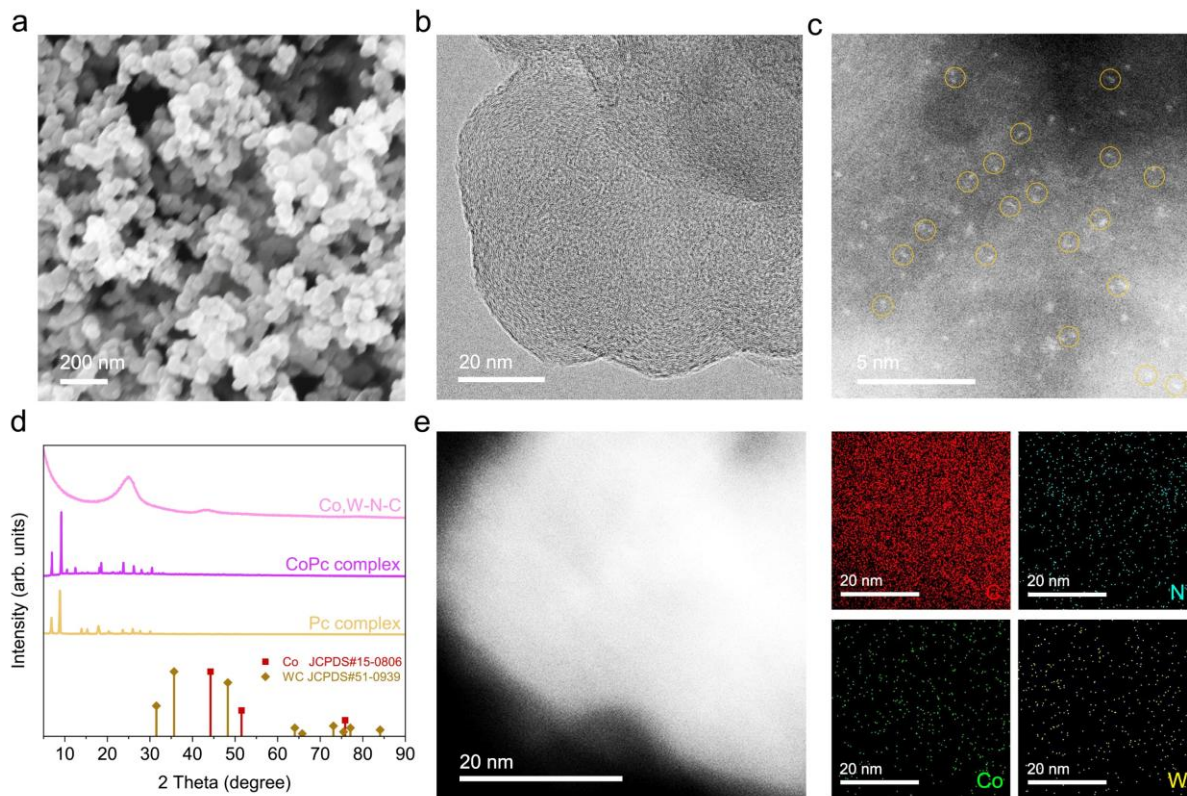

**Supplementary Fig. 6.** Morphological characterizations of Co,W-N-C catalyst. **a**, SEM image. **b**, TEM image. **c**, Aberration-corrected HAADF-STEM image. **d**, XRD patterns of Co,W-N-C catalyst, cobalt (II) phthalocyanine complex (CoPc complex) and Pc complex. **e**, HAADF-STEM image and corresponding EDX mapping images for C (red), N (blue), Co (green) and W (yellow).

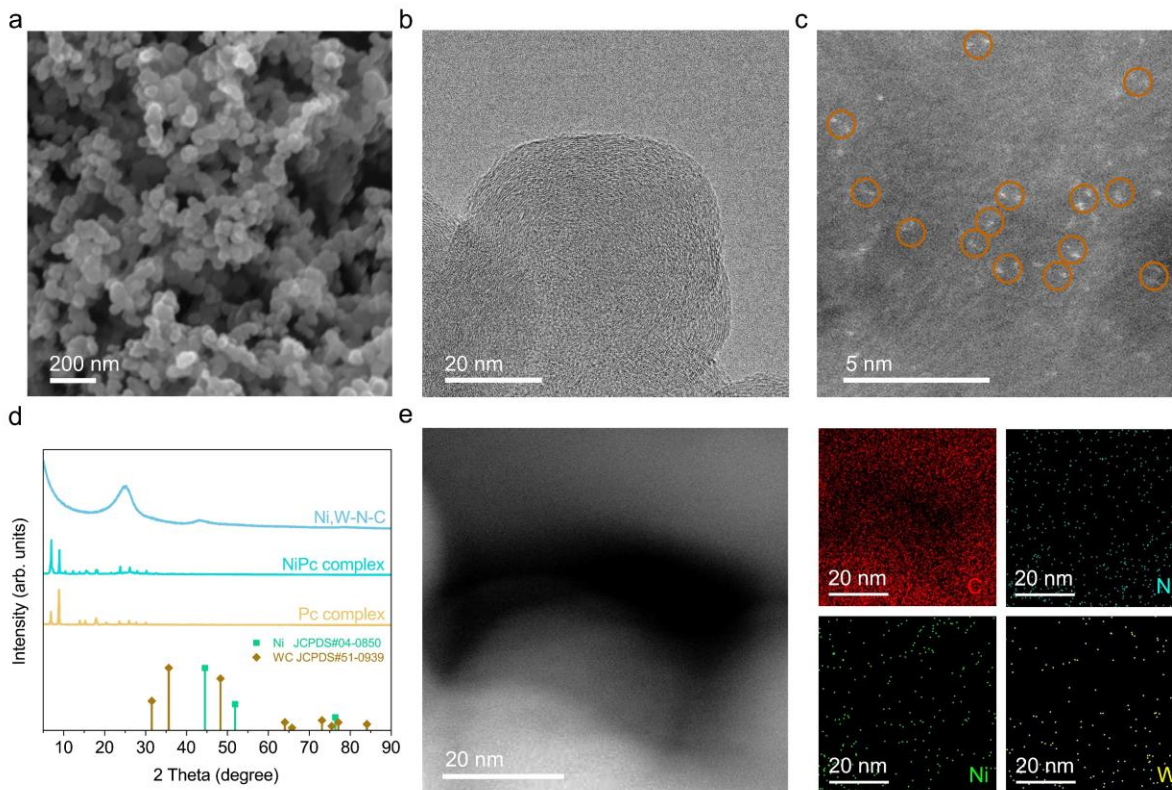

**Supplementary Fig. 7.** Morphological characterizations of Ni,W-N-C catalyst. **a**, SEM image. **b**, TEM image. **c**, Aberration-corrected HAADF-STEM image. **d**, XRD patterns of Ni,W-N-C catalyst, nickel phthalocyanine complex (NiPc complex) and Pc complex. **e**, HAADF-STEM image and corresponding EDX mapping images for C (red), N (blue), Ni (green) and W (yellow).

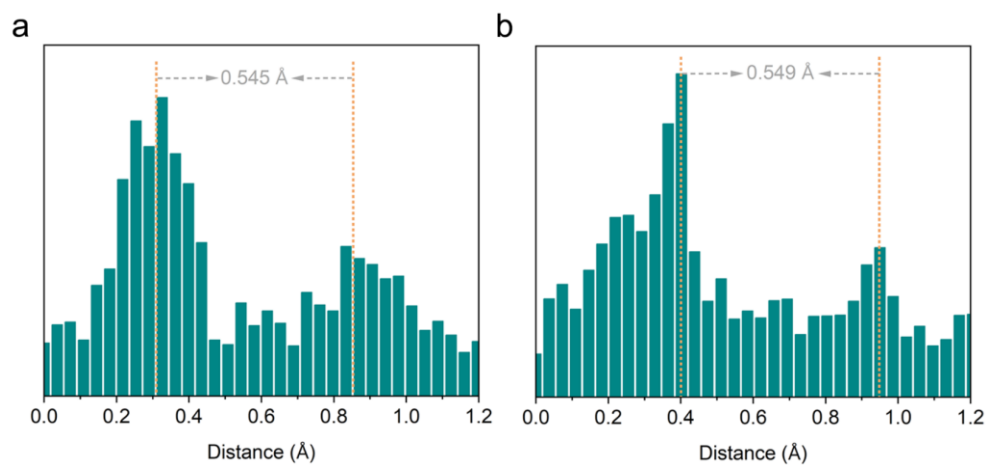

**Supplementary Fig. 8.** Distance between two adjacent metal atoms in site 1 (a) and site 2 (b).

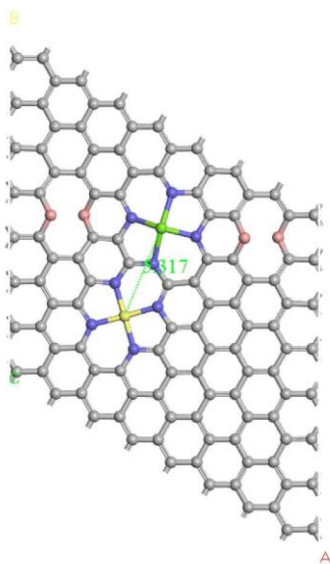

**Supplementary Fig. 9.** Atomic configuration of the Fe,W-N-C catalyst.

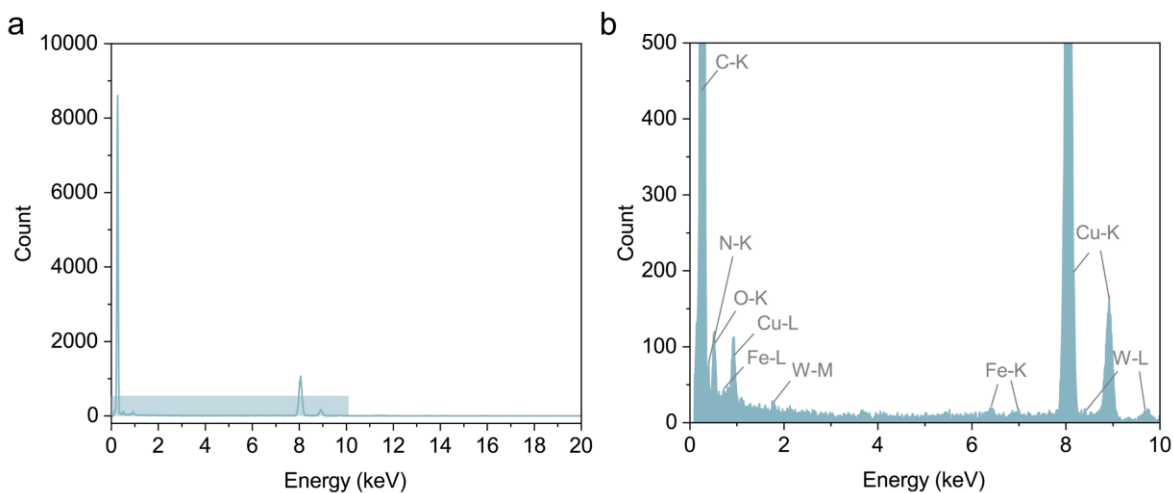

**Supplementary Fig. 10.** **a**, Corresponding EDX spectrum of the Fe,W-N-C catalyst. **b**, Enlarged EDX spectrum corresponding to the shaded area in (a).

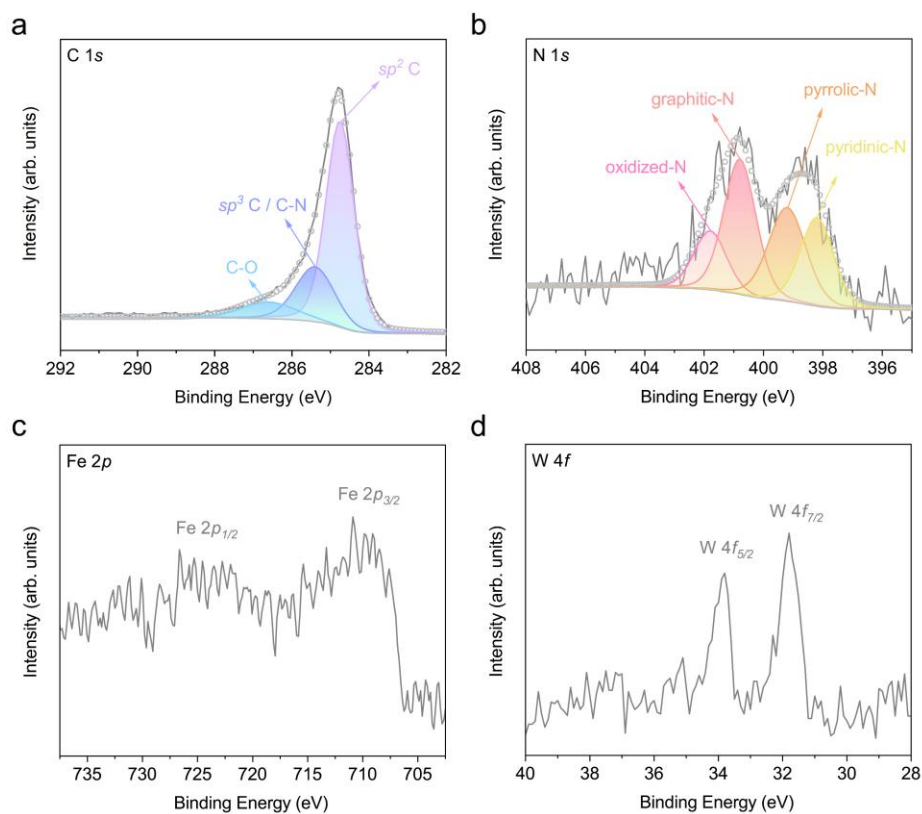

**Supplementary Fig. 11.** XPS analysis of Fe,W-N-C catalyst. **a**, High-resolution XPS spectrum of C 1s. **b**, High-resolution XPS spectrum of N 1s. **c**, High-resolution XPS spectrum of Fe 2p. **d**, High-resolution XPS spectrum of W 4f.

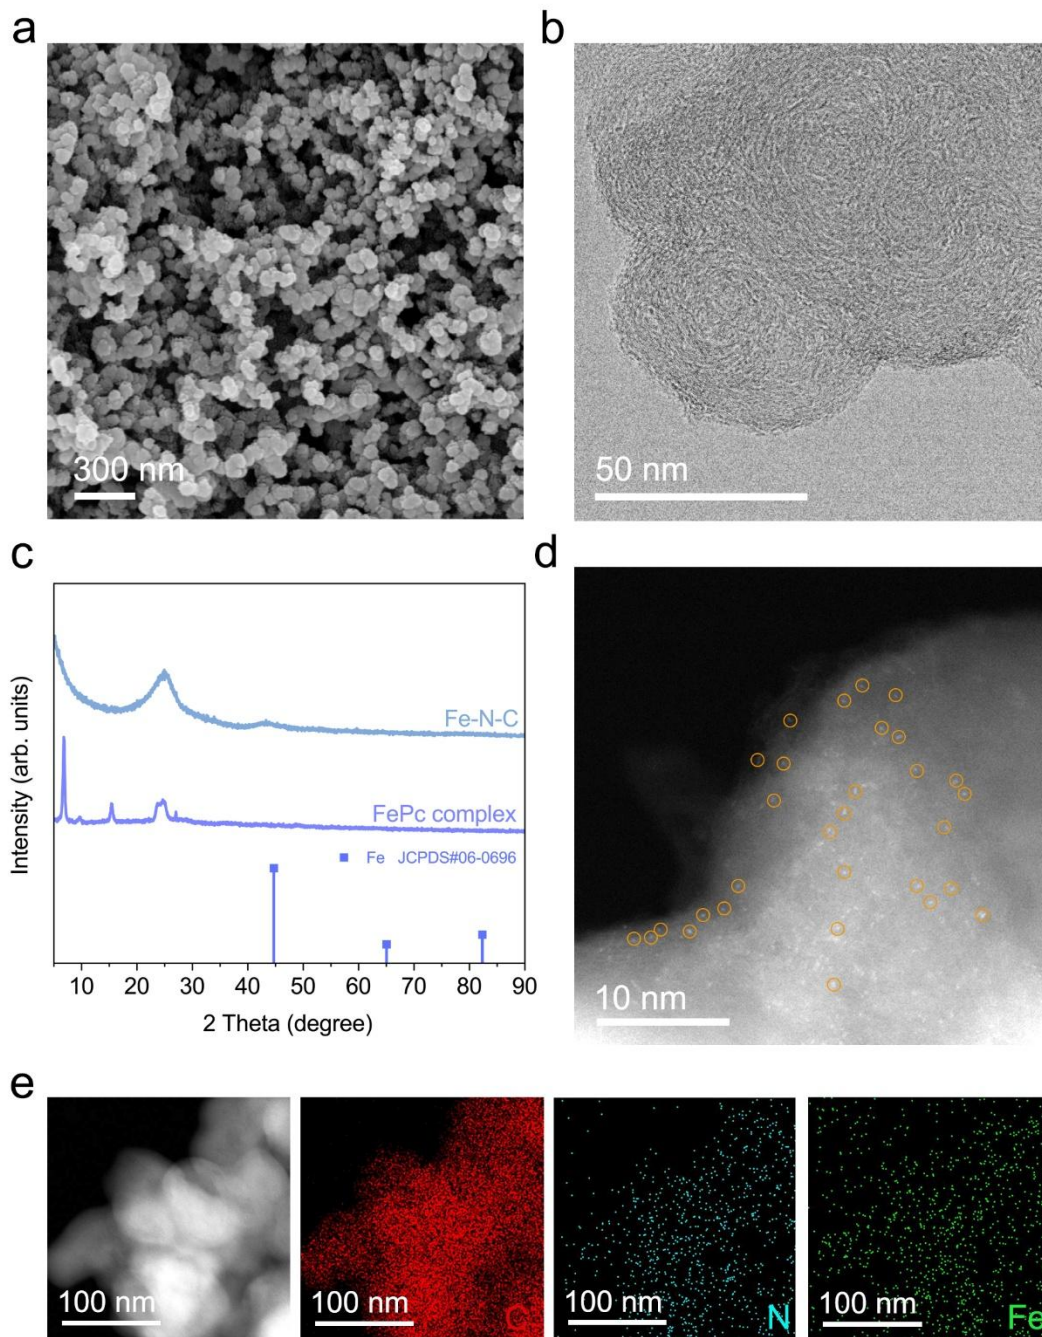

**Supplementary Fig. 12.** Morphological characterizations of Fe-N-C catalyst. **a**, SEM image. **b**, TEM image. **c**, XRD patterns of Fe-N-C catalyst and iron (II) phthalocyanine complex (FePc complex). **d**, Aberration-corrected HAADF-STEM image. **e**, HAADF-STEM image and corresponding EDX mapping images for C (red), N (blue) and Fe (green).

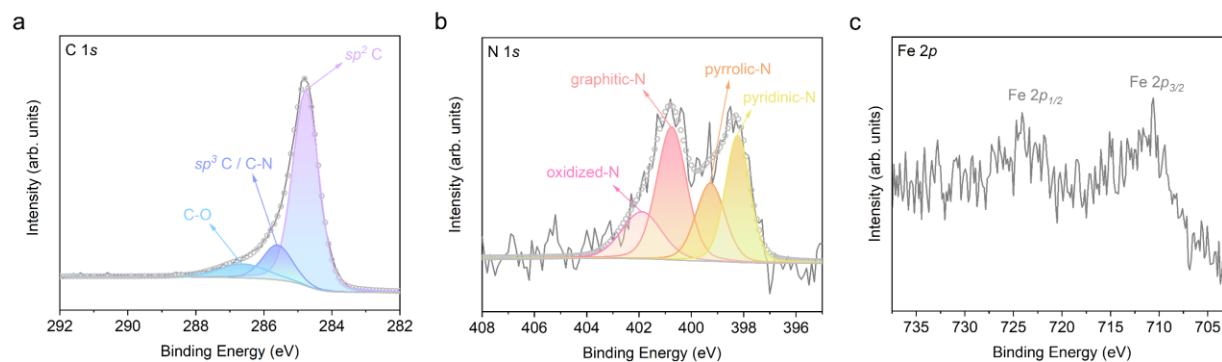

**Supplementary Fig. 13.** XPS analysis of Fe-N-C catalyst. **a**, High-resolution XPS spectrum of C 1s. **b**, High-resolution XPS spectrum of N 1s. **c**, High-resolution XPS spectrum of Fe 2p.

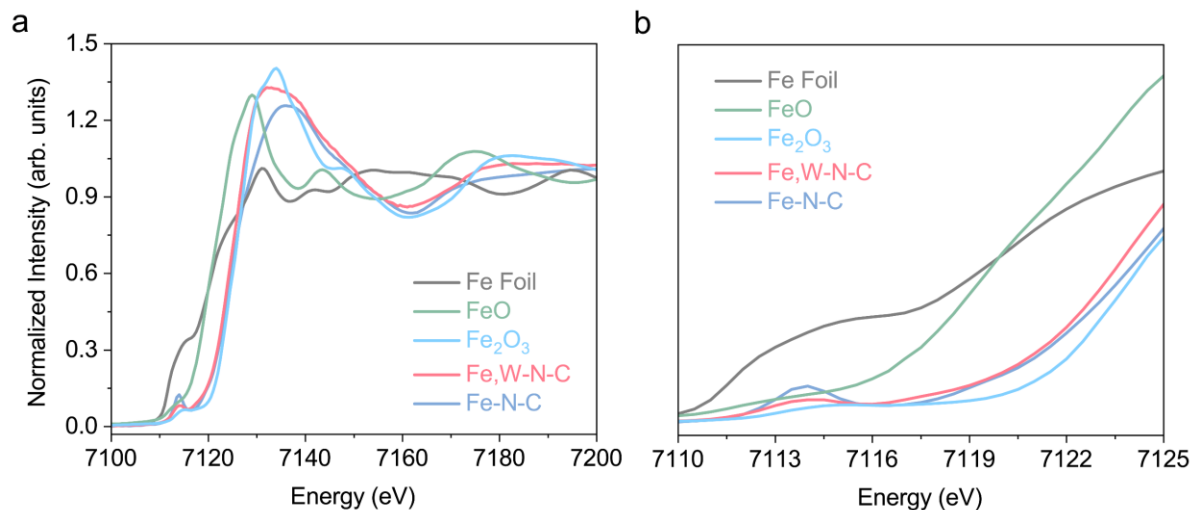

**Supplementary Fig. 14.** **a**, Normalized Fe K-edge X-ray absorption near-edge structure (XANES) spectra of Fe foil, FeO, Fe<sub>2</sub>O<sub>3</sub>, Fe,W-N-C and Fe-N-C. **b**, Expanded pre-edge region of Fe K-edge XANES spectra.

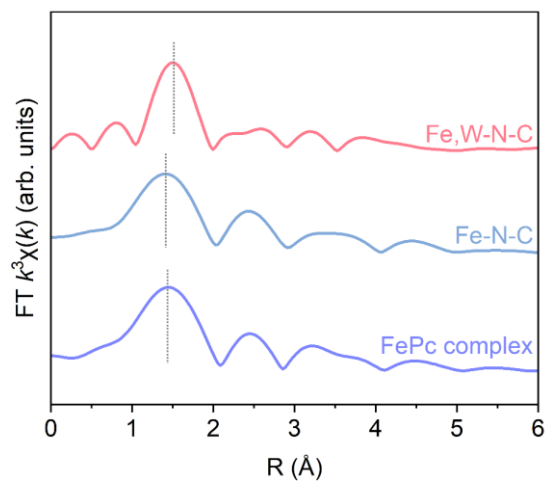

**Supplementary Fig. 15.** Fourier transformed extended X-ray absorption fine structure (FT-EXAFS) spectra at R space of FePc complex, Fe-N-C catalyst, and Fe,W-N-C catalyst.

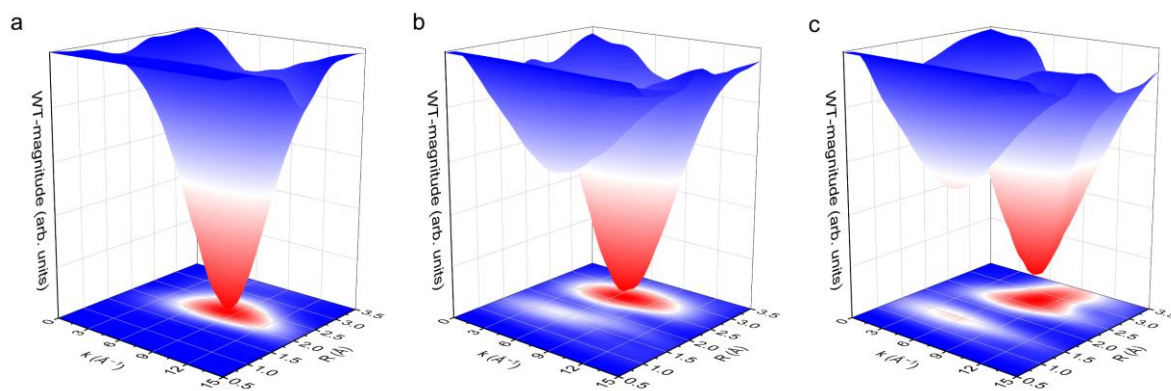

**Supplementary Fig. 16.** 3D contour wavelet transformed extended X-ray absorption fine structure maps of Fe foil (a), FeO (b) and Fe<sub>2</sub>O<sub>3</sub> (c).

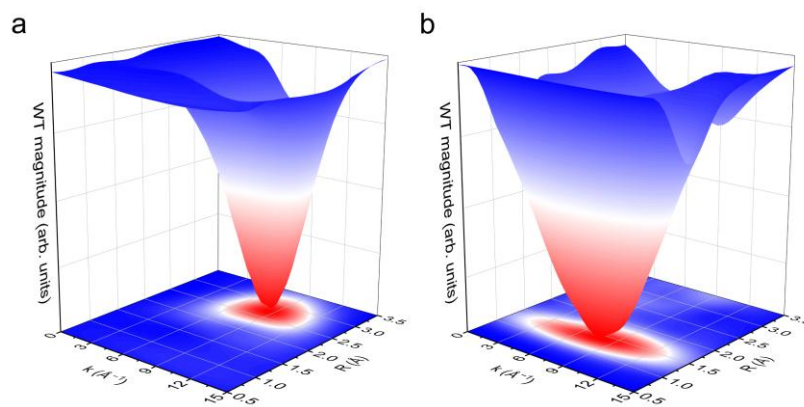

**Supplementary Fig. 17.** 3D contour wavelet transformed EXAFS maps of W powder (a) and  $\text{WO}_3$  (b).

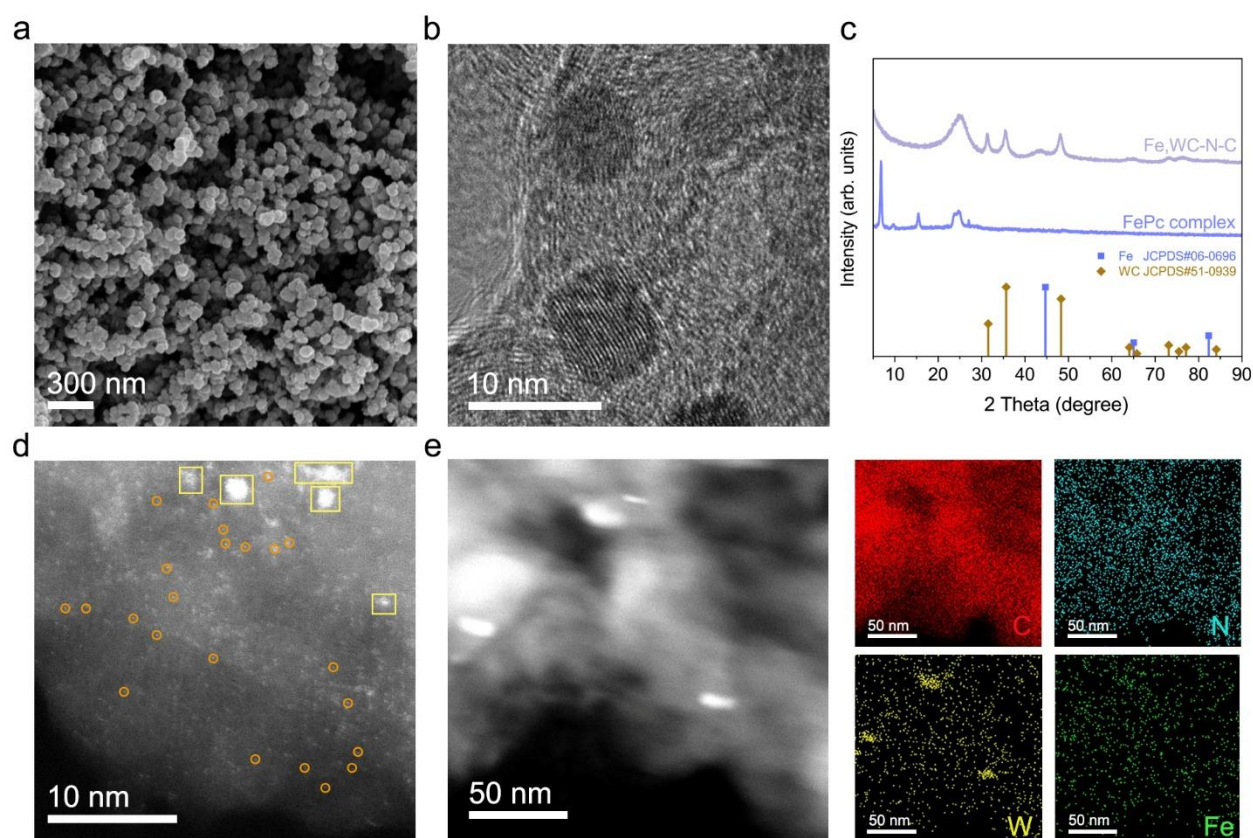

**Supplementary Fig. 18.** Morphological characterizations of Fe,WC-N-C catalyst. **a**, SEM image. **b**, TEM image. **c**, XRD patterns of Fe,WC-N-C catalyst and FePc complex. **d**, Aberration-corrected HAADF-STEM image. **e**, HAADF-STEM image and corresponding EDX mapping images for C (red), N (blue), W (yellow) and Fe (green).

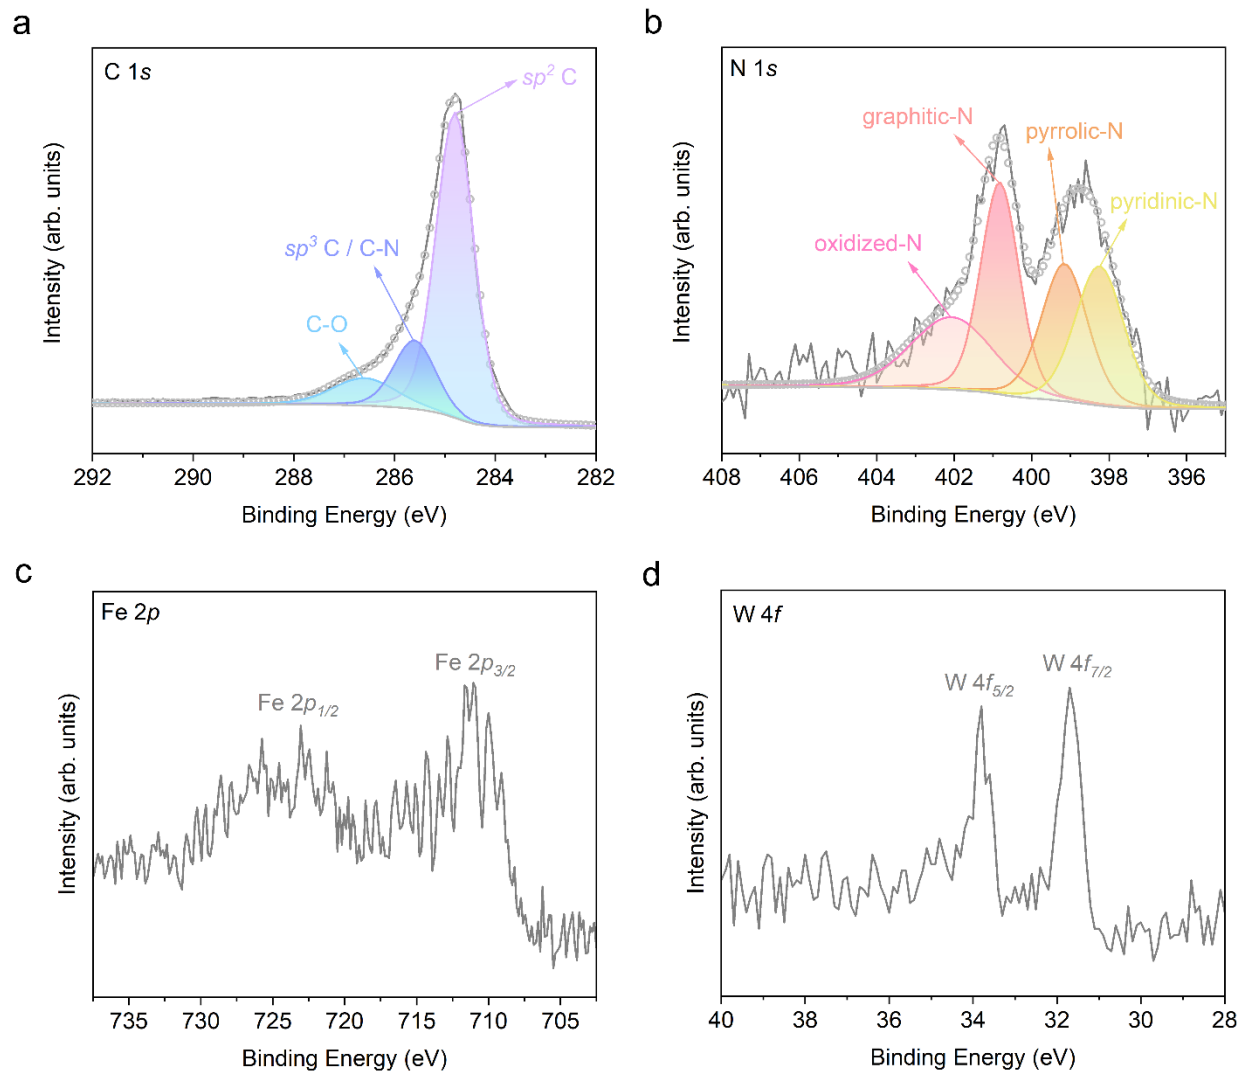

**Supplementary Fig. 19.** XPS analysis of Fe,WC-N-C. **a**, High-resolution XPS spectrum of C 1s. **b**, High-resolution XPS spectrum of N 1s. **c**, High-resolution XPS spectrum of Fe 2p. **d**, High-resolution XPS spectrum of W 4f.

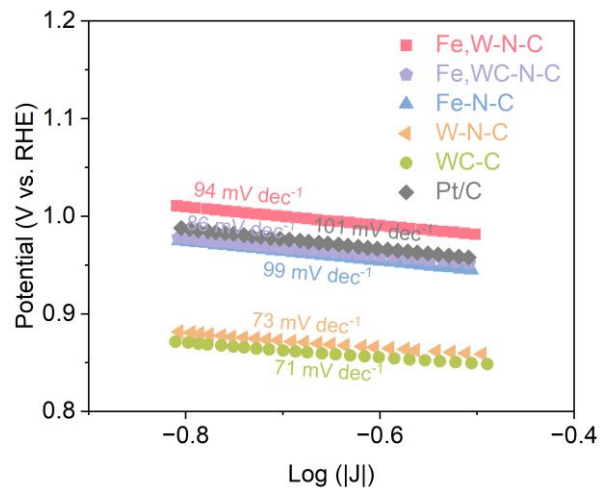

**Supplementary Fig. 20.** Tafel slopes for oxygen reduction reaction (ORR) of Fe,W-N-C, Fe,WC-N-C, Fe-N-C, W-N-C, WC-C and commercial 20 wt% Pt/C catalysts.

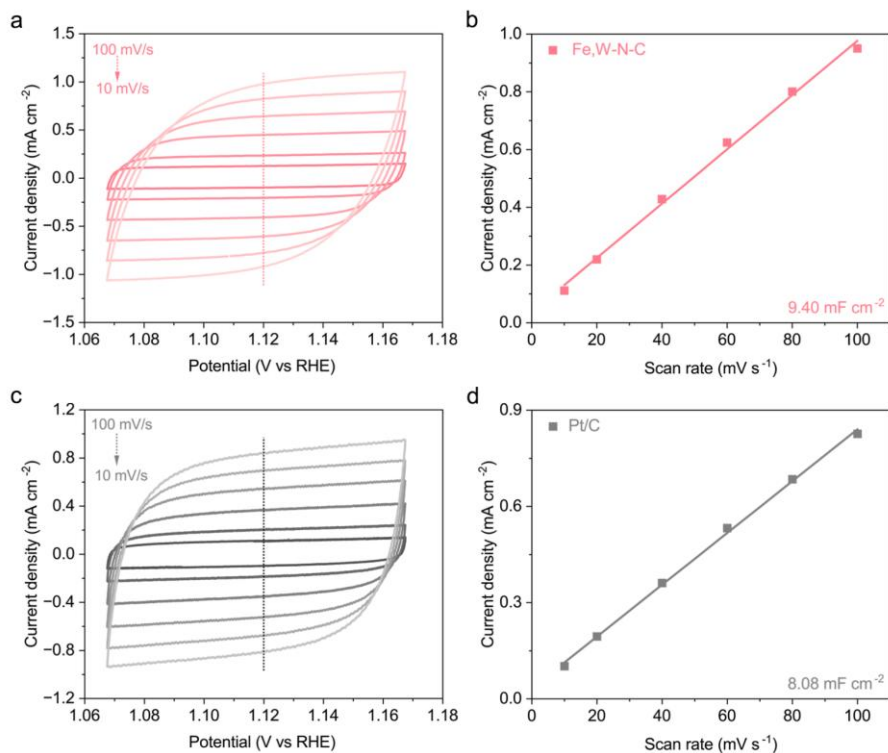

**Supplementary Fig. 21.** Cyclic voltammetry (CV) curves at different scan rates ranging from 10 to 100  $\text{mV s}^{-1}$  of Fe,W-N-C (a) and Pt/C (c) catalysts. The capacitive current densities versus scan rates at 1.12 V versus RHE of Fe,W-N-C (b) and Pt/C (d) catalysts.

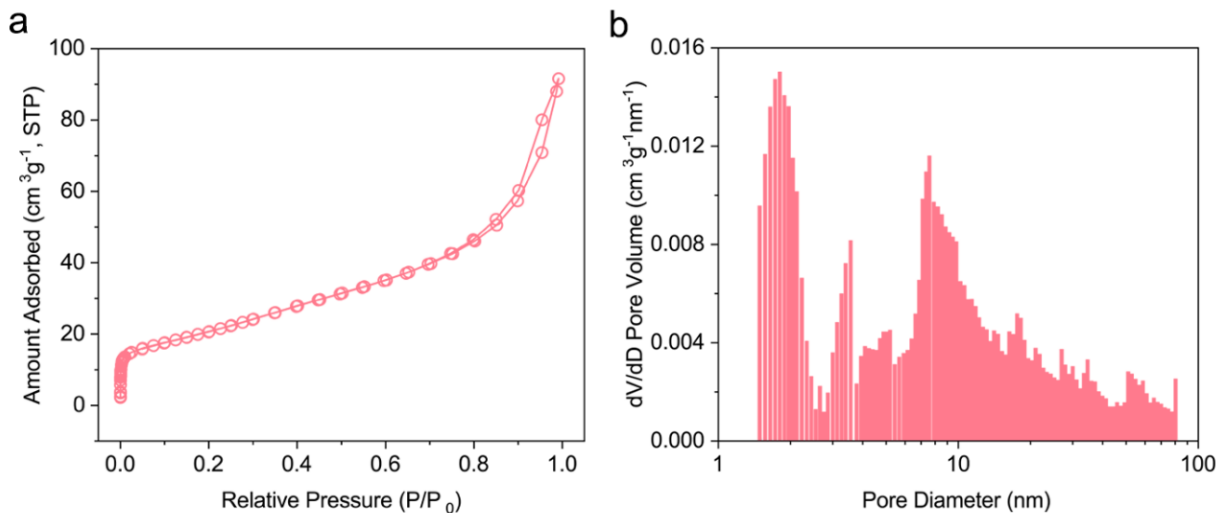

**Supplementary Fig. 22.** **a**,  $N_2$  adsorption-desorption isotherms of Fe,W-N-C catalyst. **b**, The pore size distribution.

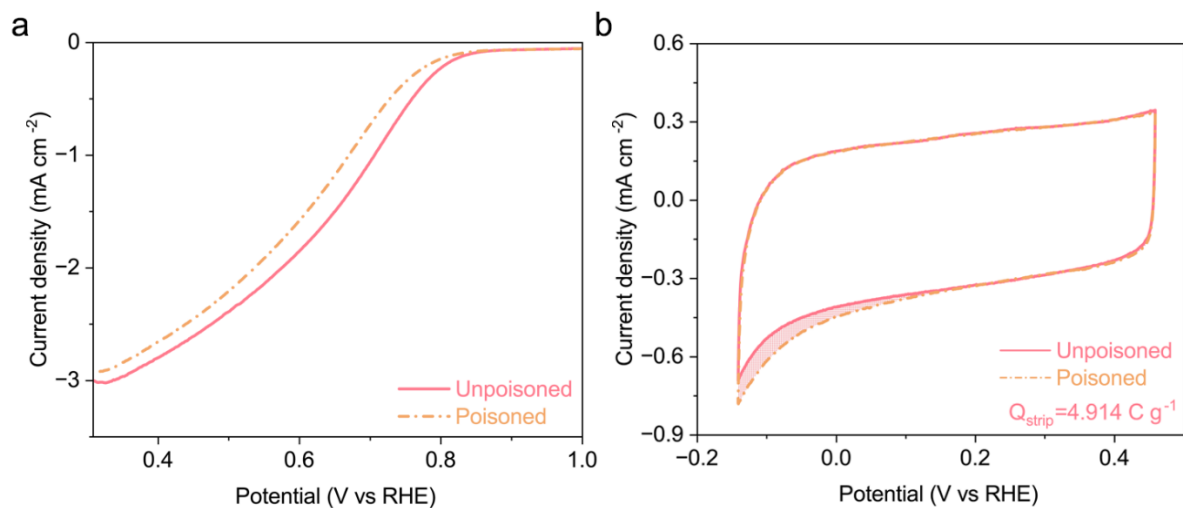

**Supplementary Fig. 23.** **a**, ORR performance of Fe,W-N-C catalyst before (unpoisoned) and during (poisoned) the nitrite adsorption. **b**, CV curves of the catalyst at unpoisoned and poisoned stages of the nitrite stripping protocol.

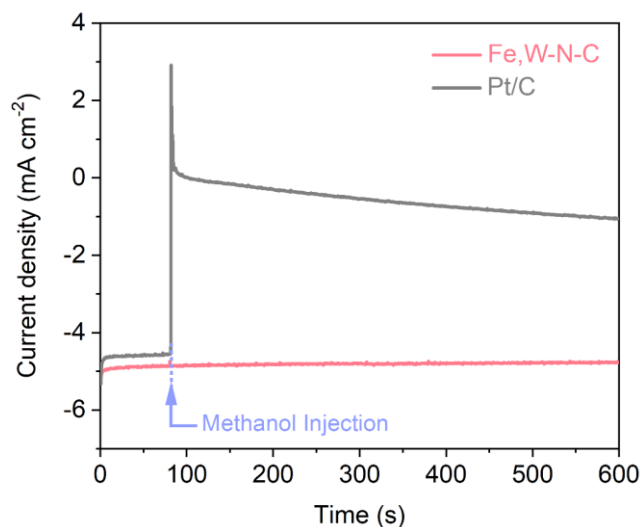

**Supplementary Fig. 24.** Methanol tolerance tests of Fe,W-N-C and commercial Pt/C catalysts at 0.70 V (V versus RHE). The chronoamperometric responses of the two catalysts before and after adding CH<sub>3</sub>OH to the electrolyte.

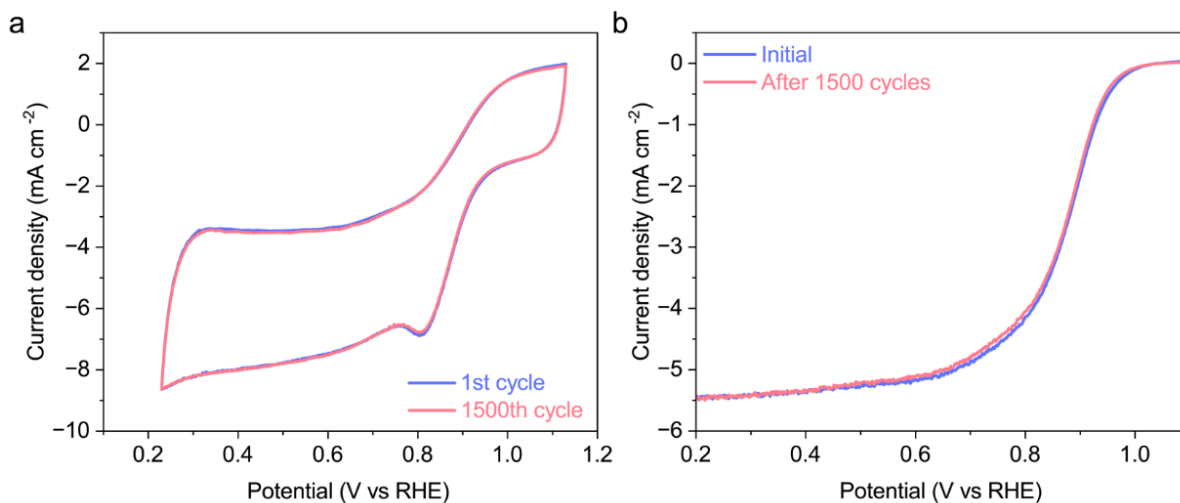

**Supplementary Fig. 25.** **a**, CV curves of the Fe,W-N-C catalyst at the 1st cycle and 1500th cycle in an O<sub>2</sub>-saturated 0.1 M KOH electrolyte. **b**, ORR polarization curves for Fe,W-N-C catalyst before and after accelerated durability testing.

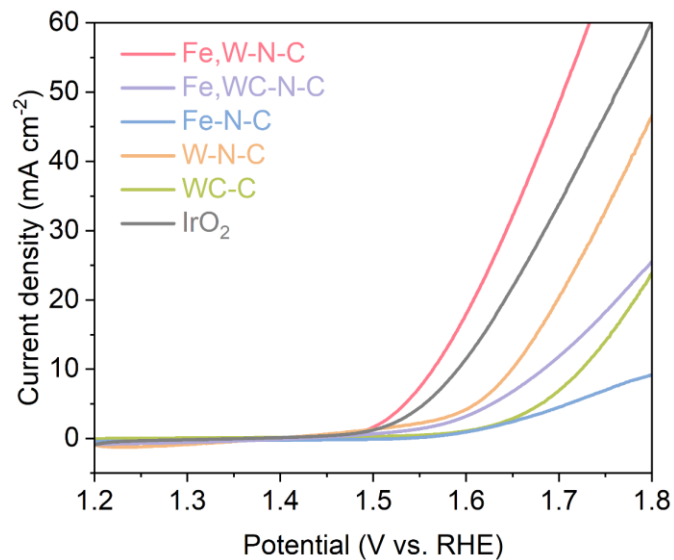

**Supplementary Fig. 26.** Oxygen evolution reaction (OER) polarization curves of Fe,W-N-C, Fe,WC-N-C, Fe-N-C, W-N-C, WC-C and commercial IrO<sub>2</sub> catalysts in 1.0 M KOH solution.

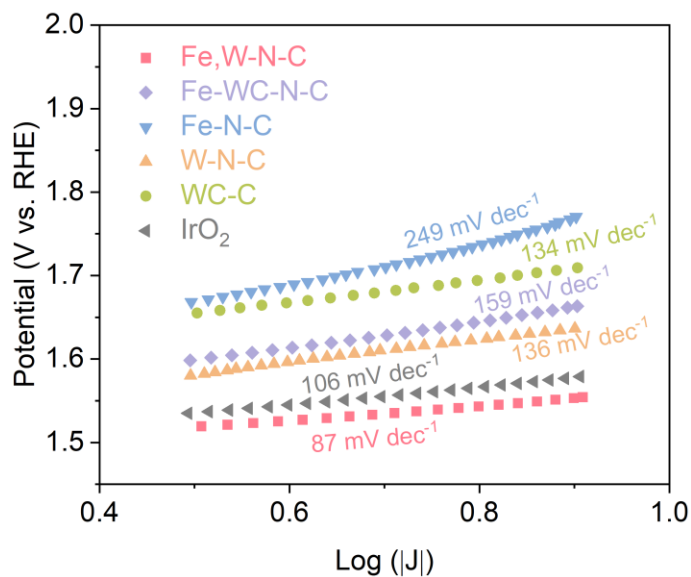

**Supplementary Fig. 27.** OER Tafel slopes of Fe,W-N-C, Fe,WC-N-C, Fe-N-C, W-N-C, WC-C and commercial IrO<sub>2</sub> catalysts.

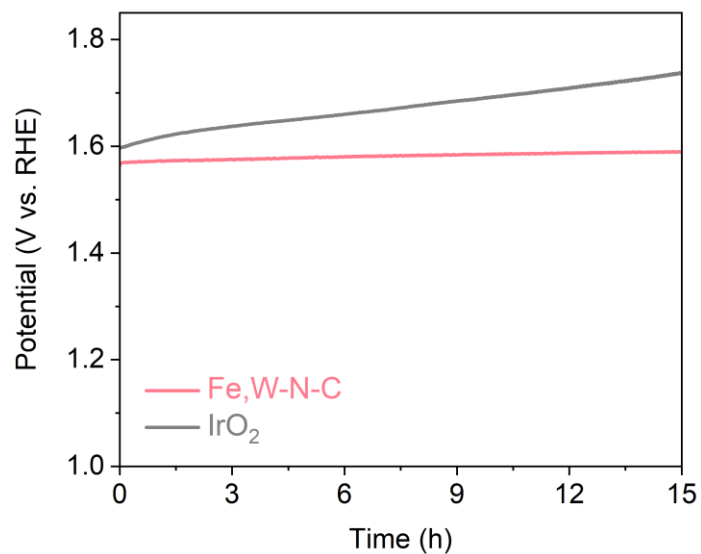

**Supplementary Fig. 28.** Long-term electrochemical OER stability tests of Fe,W-N-C and commercial IrO<sub>2</sub> catalysts.

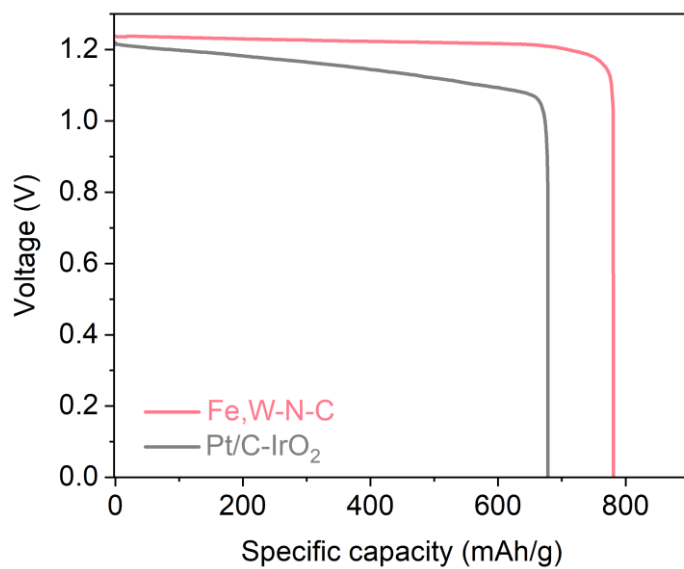

**Supplementary Fig. 29.** Specific capacity of zinc-air batteries (ZABs) with Fe,W-N-C catalyst and commercial Pt/C-IrO<sub>2</sub> catalyst as the air cathode.

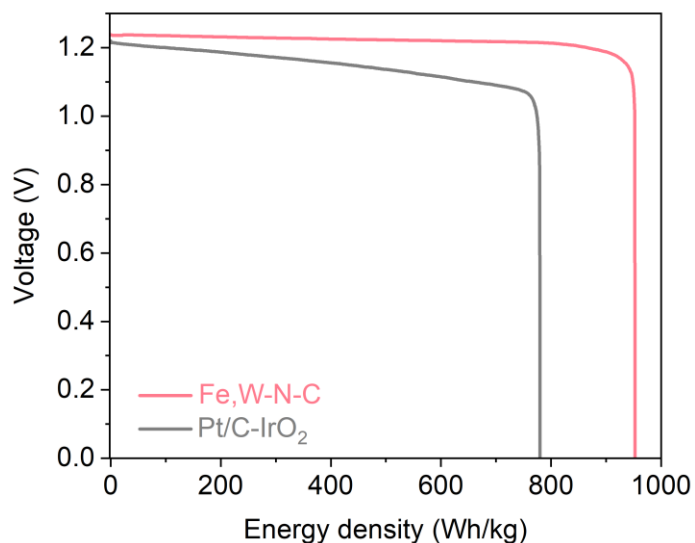

**Supplementary Fig. 30.** Energy density plots of ZABs with Fe,W-N-C catalyst and commercial Pt/C-IrO<sub>2</sub> catalyst as the air cathode.

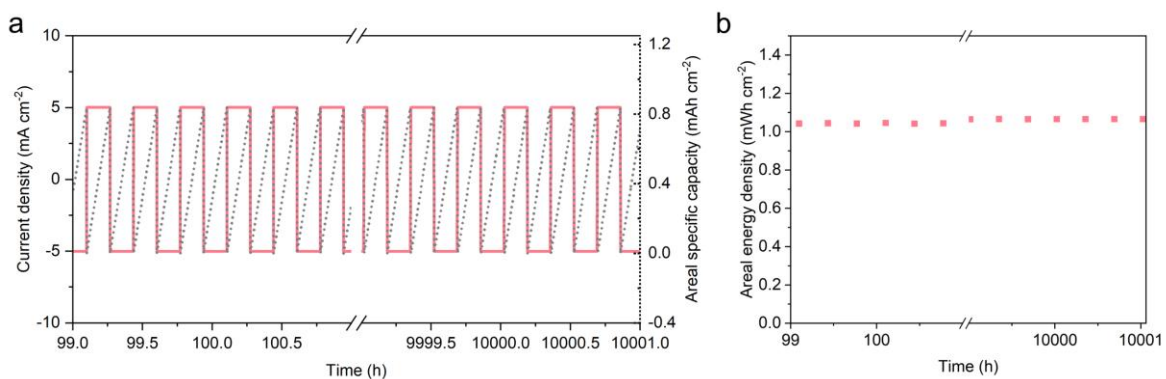

**Supplementary Fig. 31.** **a**, Enlarged current density and areal specific capacity profiles corresponds to Fig.5a. **b**, Areal energy density (based on the area of cathode) of Fe,W-N-C based ZAB at 99-101 hours and 9999-10001 hours during discharge/charge cycling at the current density of 5 mA cm<sup>-2</sup>.

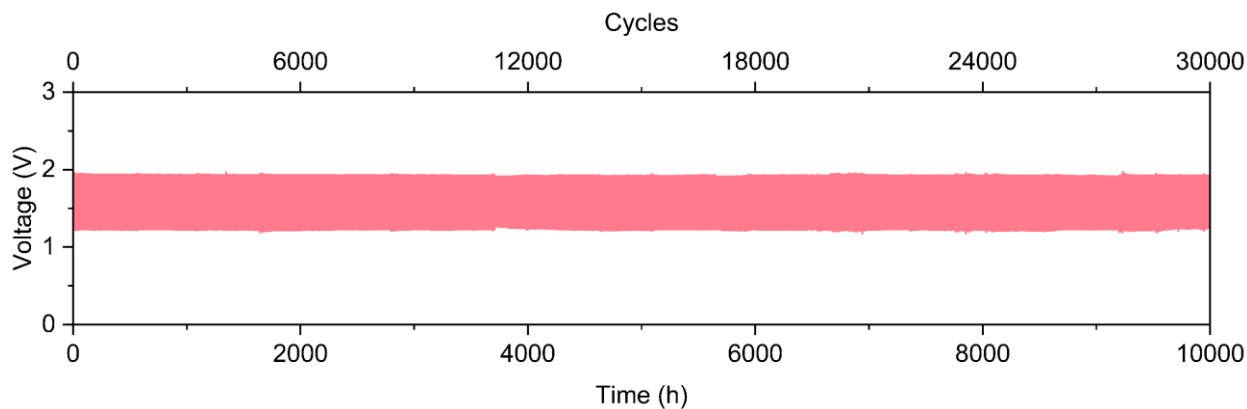

**Supplementary Fig. 32.** Repeated galvanostatic discharge/charge cycling stability test for liquid-state ZAB with Fe,W-N-C air cathode at a current density of  $5 \text{ mA cm}^{-2}$ .

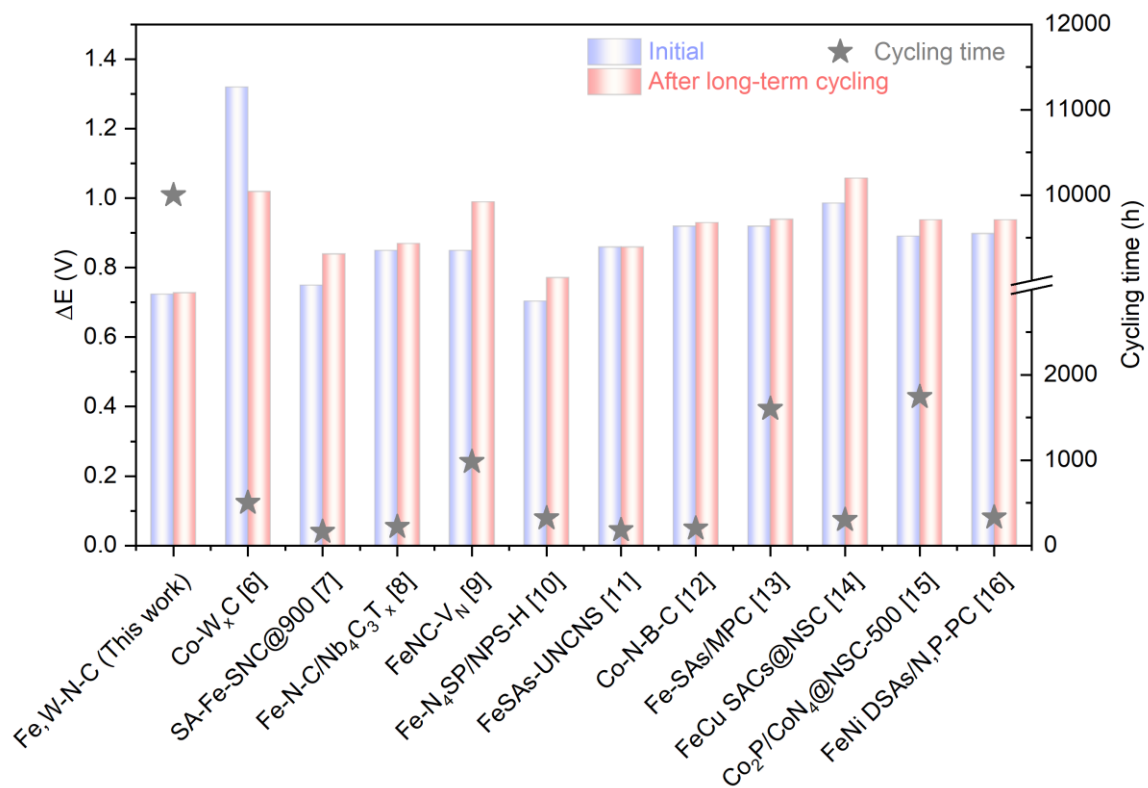

**Supplementary Fig. 33.** The ZABs performance (charge and discharge potential difference in initial and after long term cycling, and cycling time) comparison at the current density of  $5 \text{ mA cm}^{-2}$  for Fe,W-N-C with other state-of-the-art catalysts<sup>6-16</sup>.

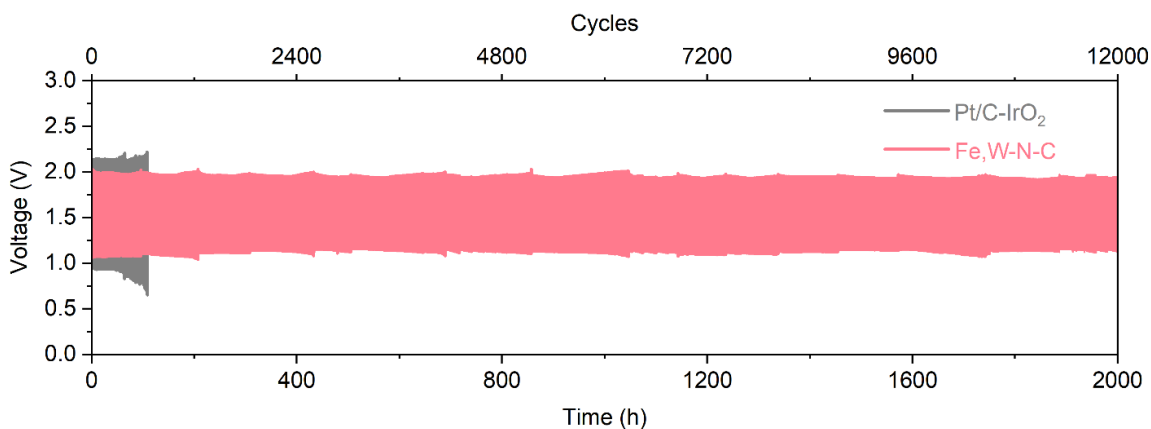

**Supplementary Fig. 34.** Galvanostatic discharge/charge cycling stabilities for liquid-state ZABs with Fe,W-N-C and Pt/C-IrO<sub>2</sub> air cathodes at a current density of 50 mA cm<sup>-2</sup>.

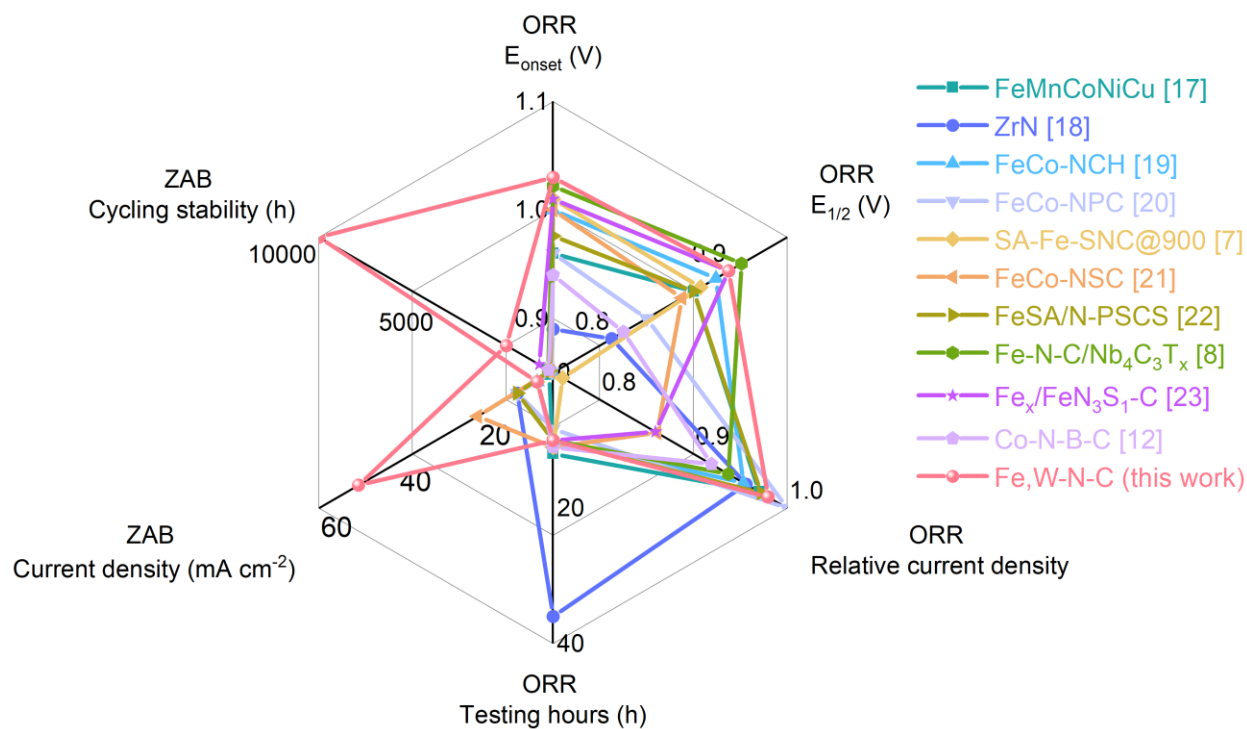

**Supplementary Fig. 35.** Comparison of ORR electrocatalytic performance and ZABs cycling lifetime of Fe,W-N-C catalyst with some previously reported catalysts<sup>7,8,12,17-23</sup>.

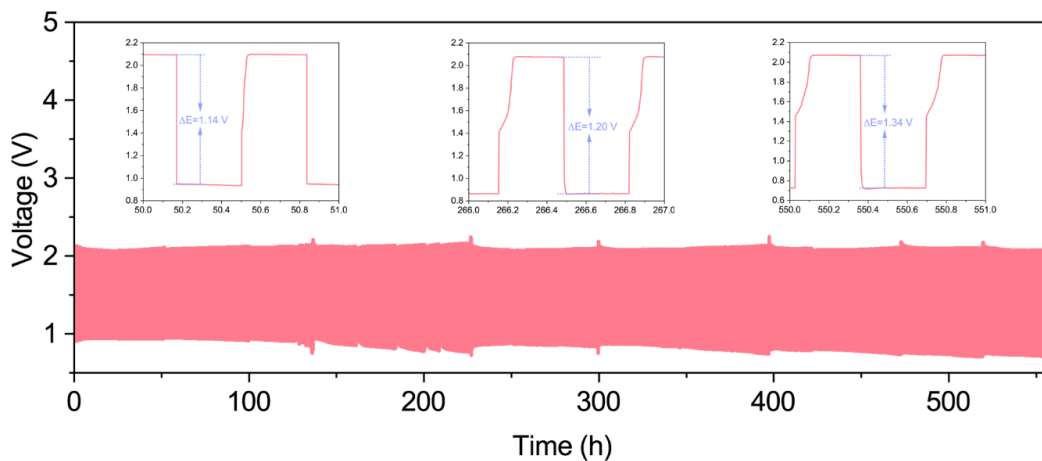

**Supplementary Fig. 36.** Galvanostatic discharge/charge cycling stability test for liquid-state ZAB based on Fe,W-N-C air cathode at the current density of  $100 \text{ mA cm}^{-2}$ .

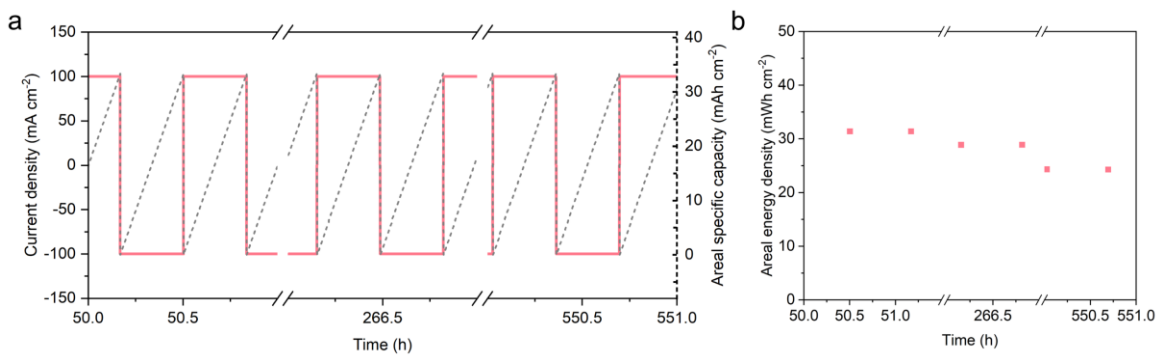

**Supplementary Fig. 37. a**, Enlarged current density and areal specific capacity profiles corresponds to Supplementary Fig. 36. **b**, Areal energy densities (based on the area of cathode) of Fe,W-N-C based ZAB at 50-52 hours, 266-267 hours, and 550-551 hours during discharge/charge cycling at the current density of  $100 \text{ mA cm}^{-2}$ .

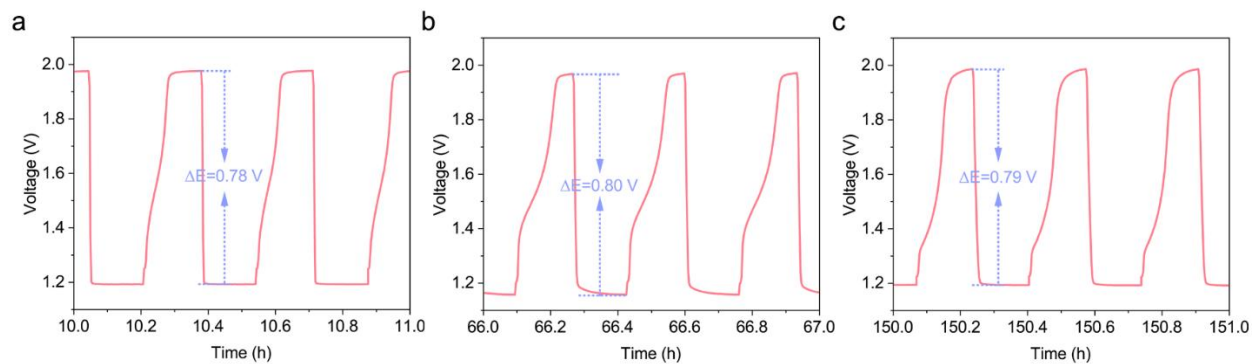

**Supplementary Fig. 38.** The enlarged voltage profile of the flexible solid-state ZAB with Fe, W-N-C catalyst as the air cathode at the flat (a) / bent (b) / revert flat (c) states.

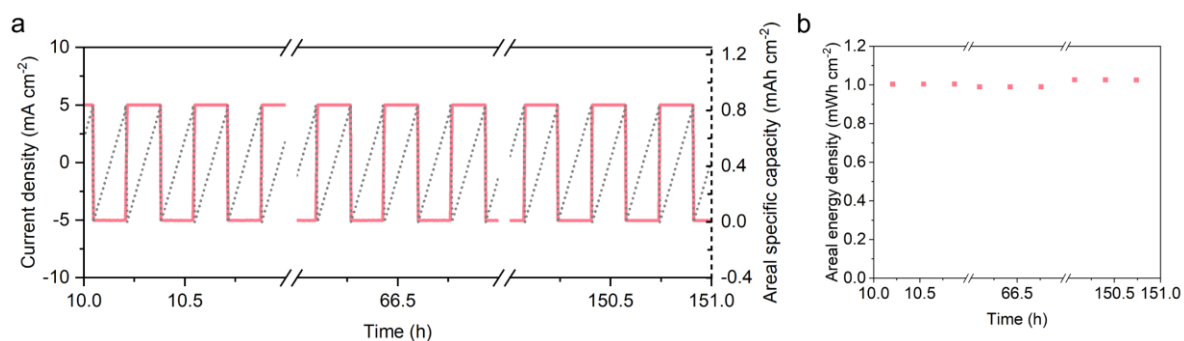

**Supplementary Fig. 39.** a, Enlarged current density and areal specific capacity profiles corresponds to Fig. 5c and Supplementary Fig. 38. b, Areal energy densities (based on the area of cathode) of Fe, W-N-C based ZAB at flat state (10-11 hours), bent state (66-67 hours), and revert flat state (150-151 hours) during discharge/charge cycling at the current density of  $5 \text{ mA cm}^{-2}$ .

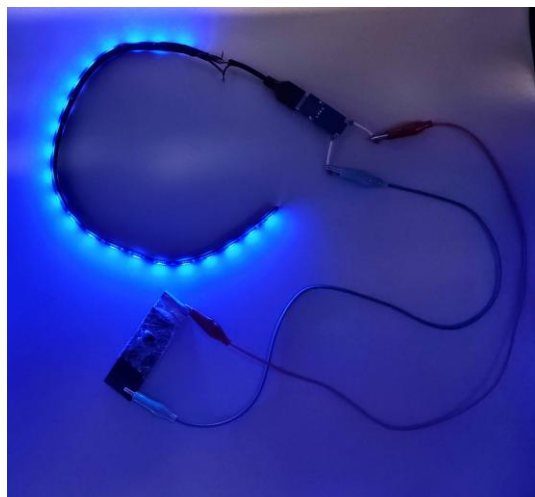

**Supplementary Fig. 40.** Photograph of a wristband with LED lights powered by the flexible solid-state ZAB with Fe,W-N-C catalyst as the air cathode.

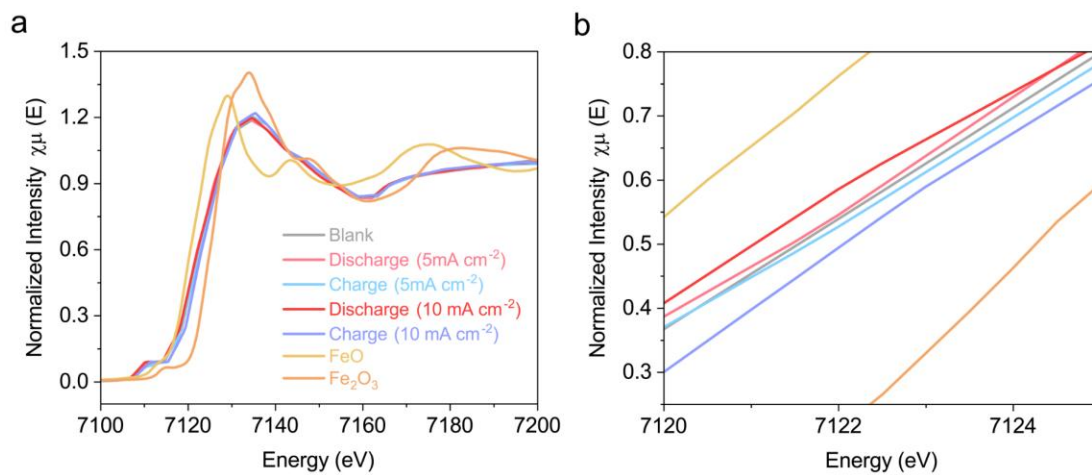

**Supplementary Fig. 41.** In situ XAS characterizations. **a**, Fe K-edge XANES spectra of Fe,W-N-C based ZAB during charge and discharge processes at different current densities. **b**, Enlarged view of the adsorption edge of XANES spectra.

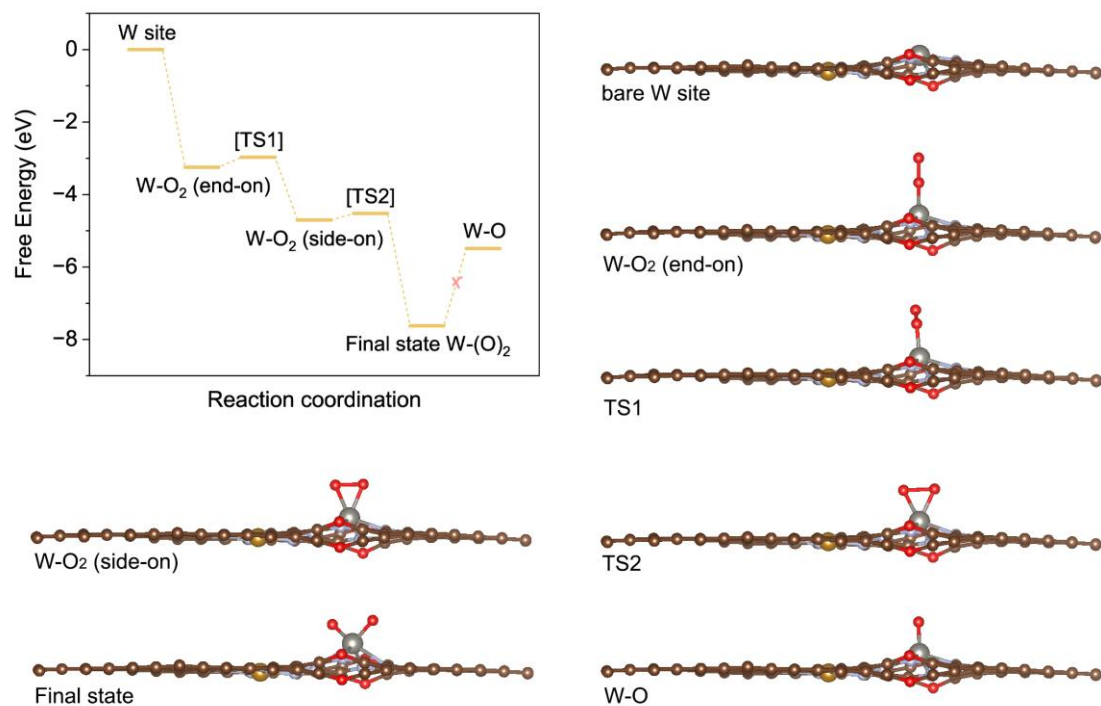

**Supplementary Fig. 42.** The atomistic structure and free energy of the initial, transition, and final states of the adsorption and dissociation reactions of O<sub>2</sub> on the W-N<sub>4</sub> site in Fe,W-N-C catalyst.

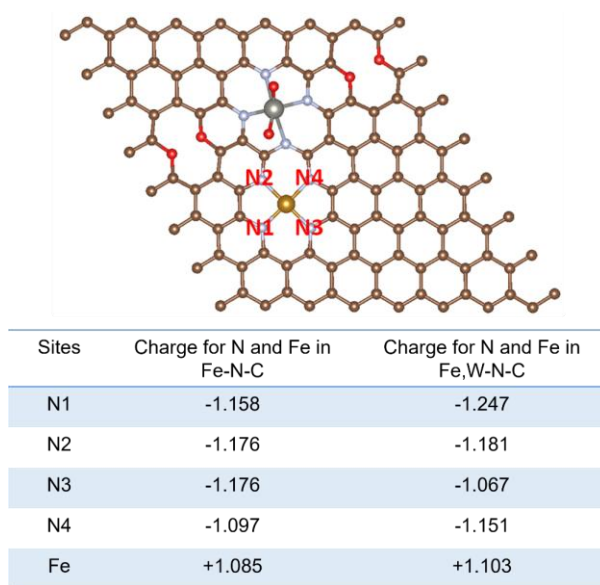

**Supplementary Fig. 43.** The Bader charge analysis of Fe and N atoms in Fe-N<sub>4</sub> site and Fe-N<sub>4</sub>/W-N<sub>4</sub>O<sub>2</sub> site.

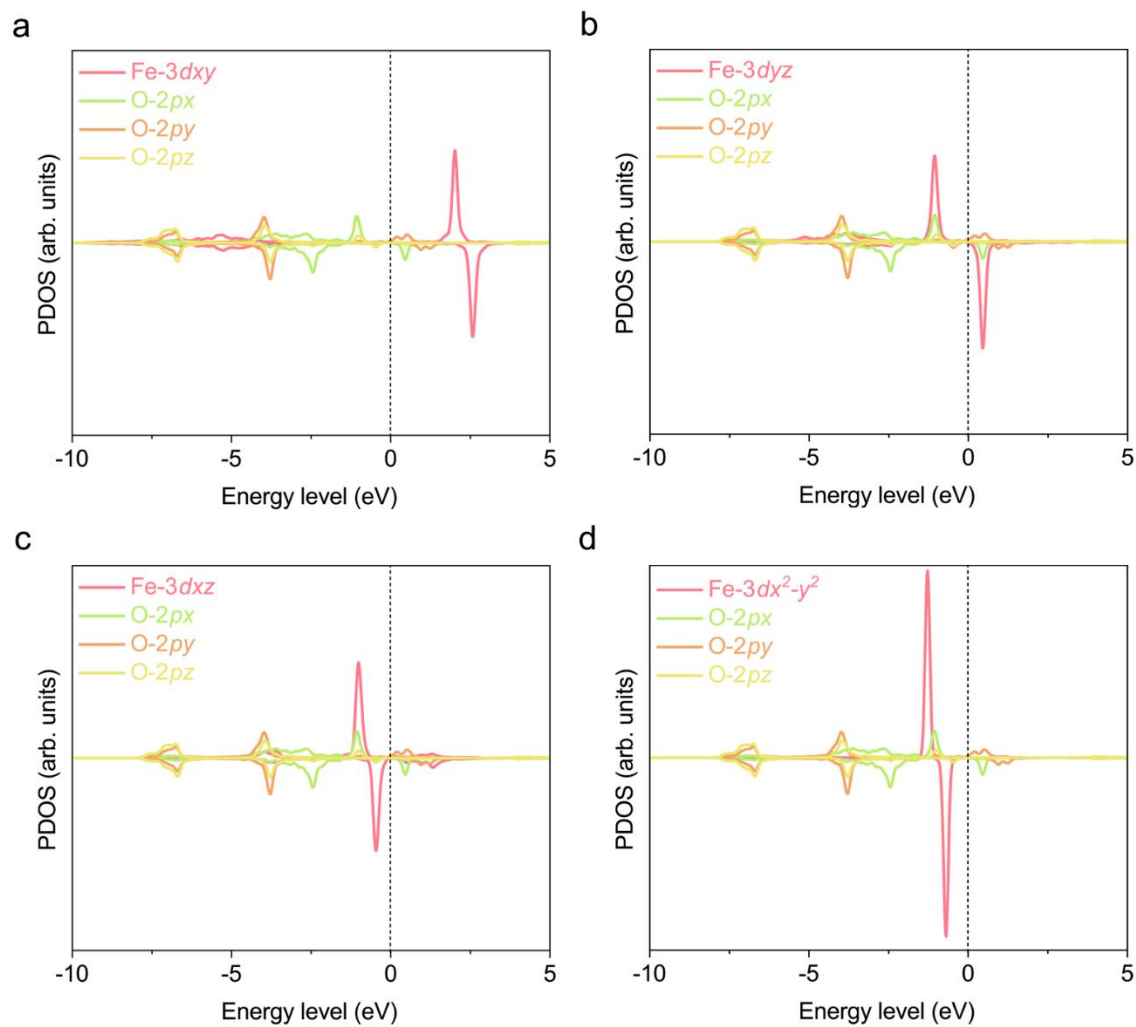

**Supplementary Fig. 44.** Projected density of state analysis of (a) Fe-3dxy, (b) Fe-3dyz, (c) Fe-3dxz and (d) Fe-3dx<sup>2</sup>-y<sup>2</sup> orbitals with O 2px/2py/2pz orbitals in \*OH intermediate on Fe-N<sub>4</sub>/W-N<sub>4</sub> site.

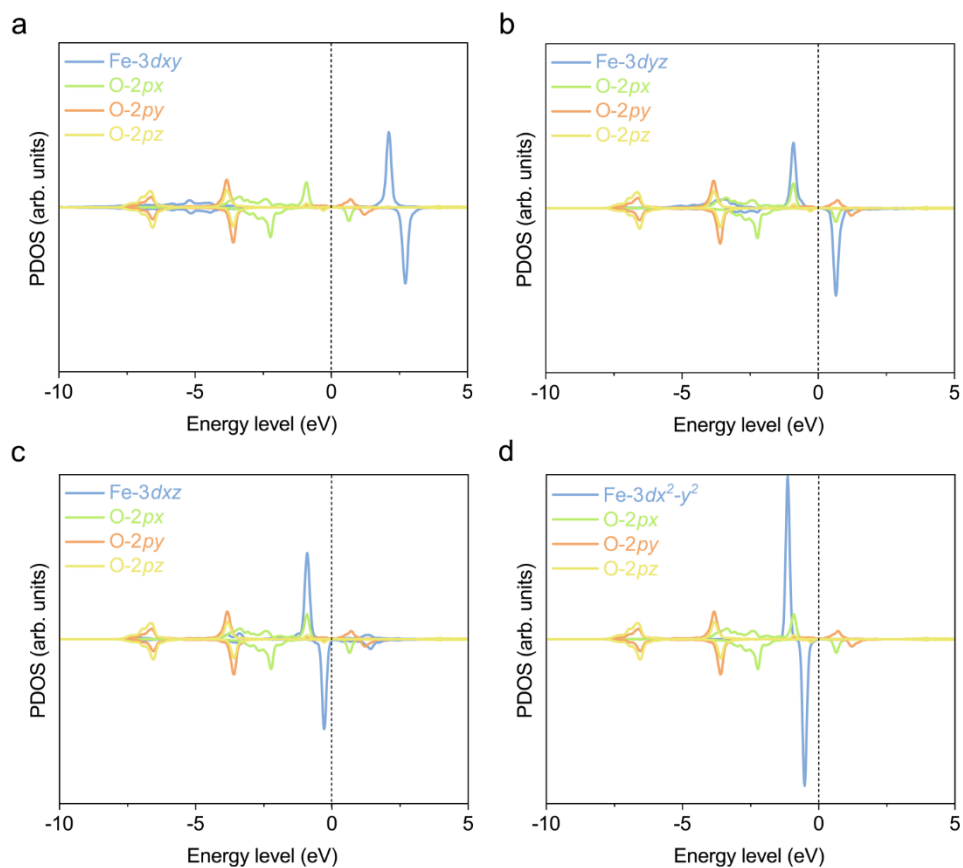

**Supplementary Fig. 45.** Projected density of state analysis of (a) Fe-3dxy, (b) Fe-3dyz, (c) Fe-3dxz and (d) Fe-3dx<sup>2</sup>-y<sup>2</sup> orbitals with O 2px/2py/2pz orbitals in \*OH intermediate on Fe-N<sub>4</sub> site.

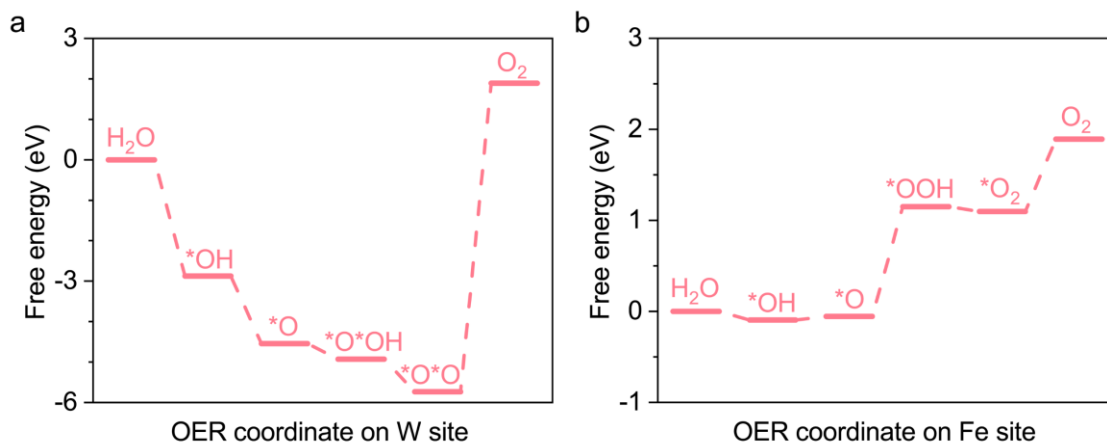

**Supplementary Fig. 46.** The free energy diagram of OER through a 4e<sup>-</sup> pathway on the W-N<sub>4</sub> site (a) and Fe-N<sub>4</sub> site (b) in Fe,W-N-C catalyst.

## Supplementary Tables

**Supplementary Table 1.** Inductively coupled plasma-optical emission spectroscopy (ICP-OES) analysis results of the as-prepared catalysts.

| Catalyst  | M (M=Fe/Co/Ni, wt%) | W (wt%) |
|-----------|---------------------|---------|
| Fe,W-N-C  | 1.25                | 4.02    |
| Fe,WC-N-C | 1.56                | 5.49    |
| Fe-N-C    | 1.34                | N/A     |
| W-N-C     | N/A                 | 4.76    |
| WC-N-C    | N/A                 | 6.23    |
| Co,W-N-C  | 1.18                | 4.06    |
| Ni,W-N-C  | 1.30                | 4.04    |

**Supplementary Table 2.** Extended X-ray absorption fine structure (EXAFS) fitting parameters for Fe foil, WO<sub>3</sub> and Fe,W-N-C catalyst.

| Sample          | Bond Type          | Coordination Number | Bond Length R (Å) | Bond disorder $\sigma^2$ (Å <sup>2</sup> ) | <i>R</i> factor |
|-----------------|--------------------|---------------------|-------------------|--------------------------------------------|-----------------|
| Fe foil         | Fe-Fe              | 8                   | 2.47±0.02         | 0.0049                                     | 0.0023          |
|                 | Fe-Fe              | 6                   | 2.85±0.01         | 0.0062                                     |                 |
| Fe,W-N-C        | Fe-N               | 4                   | 1.90±0.06         | 0.0027                                     | 0.0107          |
|                 | Fe-C               | 4                   | 2.69±0.08         | 0.0057                                     |                 |
|                 | Fe-C               | 4                   | 3.01±0.09         | 0.0025                                     |                 |
|                 | Fe-N (bond with W) | 1                   | 3.33±0.04         | 0.0023                                     |                 |
| WO <sub>3</sub> | W-O                | 4                   | 1.80±0.01         | 0.0054                                     | 0.0072          |
|                 | W-O                | 2                   | 2.15±0.03         | 0.0052                                     |                 |
| Fe,W-N-C        | W-N                | 4                   | 2.08±0.09         | 0.0014                                     | 0.0164          |
|                 | W-C                | 4                   | 2.88±0.04         | 0.0025                                     |                 |
|                 | W-C                | 4                   | 3.21±0.06         | 0.0054                                     |                 |
|                 | W-C                | 4                   | 3.65±0.06         | 0.0007                                     |                 |
|                 | W-N (bond with Fe) | 1                   | 4.29±0.05         | 0.0055                                     |                 |

**Supplementary Table 3.** Summary of the onset potential ( $E_{\text{onset}}$ ), half-wave potential ( $E_{1/2}$ ), and  $J_k$  at 0.82 V of different catalysts.

| Sample    | $E_{\text{onset}}$ Potential<br>(V, V versus RHE) | $E_{1/2}$ Potential<br>(V, V versus RHE) | $J_k$<br>(mA cm <sup>-2</sup> ) |
|-----------|---------------------------------------------------|------------------------------------------|---------------------------------|
| Fe,W-N-C  | 1.03 ± 0.018                                      | 0.90 ± 0.010                             | 17.14                           |
| Fe,WC-N-C | 1.00 ± 0.022                                      | 0.87 ± 0.005                             | 13.96                           |
| Fe-N-C    | 0.99 ± 0.011                                      | 0.84 ± 0.012                             | 7.26                            |
| W-N-C     | 0.90 ± 0.009                                      | 0.79 ± 0.020                             | 1.59                            |
| WC-N-C    | 0.88 ± 0.010                                      | 0.77 ± 0.013                             | 1.10                            |
| Pt/C      | 1.01 ± 0.013                                      | 0.85 ± 0.017                             | 9.64                            |

**Supplementary Table 4.** Summary of Tafel slopes for ORR of the as-prepared catalysts.

|                         | Fe,W-N-C | Fe,WC-N-C | Fe-N-C | W-N-C | WC-N-C | Pt/C |
|-------------------------|----------|-----------|--------|-------|--------|------|
| Tafel Slope<br>(mV/dec) | 94       | 86        | 99     | 73    | 71     | 101  |

**Supplementary Table 5.** ORR electrocatalytic performance comparison of Fe,W-N-C with other state-of-the-art catalysts in 0.1 M KOH.

| Catalyst                    | Loading Amount (mg cm <sup>-2</sup> ) | E <sub>onset</sub> | E <sub>1/2</sub> | Stability                                  | Ref.                                                             |
|-----------------------------|---------------------------------------|--------------------|------------------|--------------------------------------------|------------------------------------------------------------------|
| <b>Fe,W-N-C</b>             | <b>0.2</b>                            | <b>1.03</b>        | <b>0.90</b>      | <b>97.94% after 36000 s</b>                | <b>This Work</b>                                                 |
| Co(CN) <sub>3</sub> -Cub    | 2.04                                  | 0.99               | 0.90             | E <sub>1/2</sub> -20 mV after 10000 cycles | [24]<br><i>Nat. Catal.</i> <b>6</b> , 1164-1173 (2023)           |
| HESA                        | 0.127                                 | 0.96               | 0.87             | 97% after 43200 s                          | [17]<br><i>Nat. Sustain.</i> <b>6</b> , 816-826 (2023)           |
| (101) copper phosphosulfide | 0.1                                   | -                  | 0.90             | E <sub>1/2</sub> -11 mV after 30000 cycles | [25]<br><i>Nat. Energy</i> <b>6</b> , 592-604 (2021)             |
| ZrN NPs                     | 0.125                                 | 0.89               | 0.80             | 95.6% after 36 h                           | [18]<br><i>Nat. Mater.</i> <b>19</b> , 282-286 (2020)            |
| 4.3% NiFe-MOF               | 2.0                                   | 0.92               | 0.83             | 97% after 200 h                            | [26]<br><i>Nat. Energy</i> <b>4</b> , 115-122 (2019)             |
| NFLGDY-900c                 | 0.6                                   | -                  | 0.87             | 92% after 10000 s                          | [27]<br><i>Nat. Chem.</i> <b>10</b> , 924-931 (2018)             |
| FeCo-NCH                    | 0.33                                  | -                  | 0.889            | E <sub>1/2</sub> -8 mV after 10000 cycles  | [19]<br><i>Nat. Commun.</i> <b>14</b> , 1822 (2023)              |
| HESACs (FeCoNiCuMn)         | 0.18                                  | 0.999              | 0.887            | 93.33% after 25000 s                       | [28]<br><i>Nat. Commun.</i> <b>13</b> , 5071 (2022)              |
| Co SA-NDGs                  | 0.3                                   | 1.02               | -                | E <sub>1/2</sub> -11 mV after 5000 cycles  | [29]<br><i>Nat. Commun.</i> <b>13</b> , 3689 (2022)              |
| FeNC-V <sub>N</sub>         | 0.3                                   | 0.99               | 0.902            | No degradation after 5000 cycles           | [8]<br><i>J. Am. Chem. Soc.</i> <b>146</b> , 4803-4813 (2024)    |
| P/Fe-N-C                    | 0.6                                   | 1.01               | 0.90             | E <sub>1/2</sub> -2 mV after 36000 s       | [30]<br><i>J. Am. Chem. Soc.</i> <b>145</b> , 3647-3655 (2023)   |
| MNCSs                       | 0.126                                 | -                  | 0.82             | E <sub>1/2</sub> -6mV after 5000 cycles    | [31]<br><i>J. Am. Chem. Soc.</i> <b>144</b> , 11767-11777 (2022) |
| Co-Fe ZIF (S-CFZ)           | 0.3                                   | -                  | 0.85             | 91% after 100 h                            | [32]<br><i>J. Am. Chem. Soc.</i> <b>144</b> , 4783-4791 (2022)   |
| Fe-Co-Ni MOF                | 0.28                                  | 0.82               | 0.75             | -                                          | [33]<br><i>J. Am. Chem. Soc.</i> <b>144</b> , 3411-3428 (2022)   |
| Ru-SAS/SNC                  | 0.4                                   | 0.998              | 0.861            | E <sub>1/2</sub> -24 mV after 30000 cycles | [34]<br><i>J. Am. Chem. Soc.</i> <b>144</b> , 2197-2207 (2022)   |
| Mn-RuO <sub>2</sub>         | 0.2                                   | -                  | 0.86             | 95.5% after 50 h                           | [35]<br><i>J. Am. Chem. Soc.</i> <b>144</b> , 2694-2704 (2022)   |

|                                                     |       |       |       |                                             |                                                                     |
|-----------------------------------------------------|-------|-------|-------|---------------------------------------------|---------------------------------------------------------------------|
| FeCo-NPC                                            | 0.51  | 0.96  | 0.83  | no obvious change after 30000 s             | [20]<br><i>Adv. Mater.</i> <b>36</b> , 2306047 (2024)               |
| YN <sub>4</sub> -Cl                                 | 0.41  | 0.93  | 0.85  | 95% after 43200 s                           | [36]<br><i>Adv. Mater.</i> <b>35</b> , 2300381 (2023)               |
| Fe <sub>II</sub> -N-C                               | 0.6   | -     | 0.91  | E <sub>1/2</sub> -29 mV after 100000 cycles | [37]<br><i>Adv. Mater.</i> <b>35</b> , 2210714 (2023)               |
| H-3DOM-Co/ONC                                       | 0.2   | 0.94  | 0.84  | 94% after 30000 s                           | [38]<br><i>Adv. Mater.</i> <b>35</b> , 2301894 (2023)               |
| V-CMO/5rGO                                          | 0.255 | -     | 0.86  | 90% after 36000 s                           | [39]<br><i>Adv. Mater.</i> <b>35</b> , 2303109 (2023)               |
| DAF-COF                                             | 0.167 | 0.89  | 0.74  | 94.3% after 36000 s                         | [40]<br><i>Adv. Mater.</i> <b>35</b> , 2209129 (2023)               |
| Fe-Zn@SNC                                           | 0.51  | 0.99  | 0.86  | E <sub>1/2</sub> -25 mV after 2000 cycles   | [41]<br><i>Angew. Chem. Int. Ed.</i> <b>135</b> , e202301833 (2023) |
| Pd-Gd <sub>2</sub> O <sub>3</sub> /C                | 0.255 | 0.986 | 0.877 | 90.1 % after 39600 s                        | [42]<br><i>Angew. Chem. Int. Ed.</i> <b>62</b> , e202314565 (2023)  |
| Mn-SAS                                              | -     | 0.99  | 0.85  | 98.5% after 22000 s                         | [43]<br><i>Angew. Chem. Int. Ed.</i> <b>62</b> , e202314933 (2023)  |
| SA-Fe-SNC@900                                       | 0.255 | 1.01  | 0.876 | 94.4% after 40000 s                         | [7]<br><i>Adv. Mater.</i> <b>35</b> , 2209948 (2023)                |
| Co-N-B-C                                            | 0.102 | 0.94  | 0.81  | 91.9% after 40000 s                         | [12]<br><i>Energy Environ. Mater.</i> <b>7</b> , e12569 (2024)      |
| FeCo-NSC                                            | 0.4   | -     | 0.86  | 86.1% after 40000 s                         | [21]<br><i>Energy Storage Mater.</i> <b>45</b> , 805-813 (2022)     |
| FeSA/N-PSCS                                         | 0.4   | 0.976 | 0.87  | E <sub>1/2</sub> -3 mV after 5000 cycles    | [22]<br><i>Energy Storage Mater.</i> <b>59</b> , 102790 (2023)      |
| Fe <sub>x</sub> /FeN <sub>3</sub> S <sub>1</sub> -C | 0.255 | 1.01  | 0.9   | 85.92% after 36000 s                        | [23]<br><i>Energy Environ. Sci.</i> <b>17</b> , 4746-4757 (2024)    |

**Supplementary Table 6.** Summary of the potential at a constant current density of 10 mA cm<sup>-2</sup> (E<sub>J=10</sub>) and Tafel slopes for OER of the as-prepared catalysts.

|                       | Fe,W-N-C | Fe,WC-N-C | Fe-N-C | W-N-C | WC-N-C | IrO <sub>2</sub> |
|-----------------------|----------|-----------|--------|-------|--------|------------------|
| E <sub>J=10</sub> (V) | 1.56     | 1.68      | 1.81   | 1.64  | 1.72   | 1.59             |
| Tafel Slope (mV/dec)  | 87       | 159       | 249    | 136   | 134    | 106              |

**Supplementary Table 7.** The zinc-air batteries performance comparison of Fe,W-N-C with other state-of-the-art catalysts.

| Catalyst                                                | Loading Amount (mg cm <sup>-2</sup> ) | Cycling Stability (h/cycles)         | Current Density (mA cm <sup>-2</sup> ) | Ref.                                                                |
|---------------------------------------------------------|---------------------------------------|--------------------------------------|----------------------------------------|---------------------------------------------------------------------|
| Fe,W-N-C                                                | <b>0.5</b>                            | <b>Over 10,000 h (30,000 cycles)</b> | <b>5</b>                               | <b>This work</b>                                                    |
|                                                         | <b>1.0</b>                            | <b>Over 2,000 h 12,000 cycles</b>    | <b>50</b>                              |                                                                     |
|                                                         | <b>1.0</b>                            | <b>Over 550 h 825 cycles</b>         | <b>100</b>                             |                                                                     |
| HESA (FeMnCoNiCu)                                       | 1.0                                   | 200 h                                | 2                                      | [17]<br><i>Nat. Sustain.</i> <b>6</b> , 816-826 (2023)              |
| (101)-copper phosphosulfide                             | 15.0                                  | 800 h                                | 25                                     | [25]<br><i>Nat. Energy</i> <b>6</b> , 592-604 (2021)                |
| ZrN nanoparticles                                       | 1.0                                   | 100 h                                | 10                                     | [18]<br><i>Nat. Mater.</i> <b>19</b> , 282-286 (2020)               |
| PdMo bimetallic/C                                       | 1.0                                   | 500 h                                | 10                                     | [44]<br><i>Nature</i> <b>574</b> , 81-85 (2019)                     |
| CuNa-CF                                                 | 0.2                                   | 5000 h                               | 1                                      | [45]<br><i>Nat. Commun.</i> <b>15</b> , 8365 (2024)                 |
| FeCo-NCH                                                | 1.0                                   | 100 h                                | 5                                      | [19]<br><i>Nat. Commun.</i> <b>14</b> , 1822 (2023)                 |
| P/Fe-N-C                                                | 1.0                                   | 192 h                                | 10                                     | [30]<br><i>J. Am. Chem. Soc.</i> <b>145</b> , 3647-3655 (2023)      |
| Ru SAS/SNC                                              | 1.0                                   | 270 h                                | 5                                      | [34]<br><i>J. Am. Chem. Soc.</i> <b>144</b> , 2197-2207 (2022)      |
| Fe-Co-Ni MOF                                            | 1.0                                   | 120 h                                | 5                                      | [33]<br><i>J. Am. Chem. Soc.</i> <b>144</b> , 3411-3428 (2022)      |
| FeNC-V <sub>N</sub>                                     | film                                  | 980 h                                | 5                                      | [8]<br><i>J. Am. Chem. Soc.</i> <b>146</b> , 4803-4813 (2024)       |
| FeCo-NPC                                                | 10                                    | 60 h                                 | 10                                     | [20]<br><i>Adv. Mater.</i> <b>36</b> , 2306047 (2024)               |
| Fe <sub>H</sub> -N-C                                    | 1.0                                   | 1200 h                               | 5                                      | [37]<br><i>Adv. Mater.</i> <b>35</b> , 2210714 (2023)               |
| VMoON@NC                                                | 2.0                                   | 630 h                                | 10                                     | [46]<br><i>Adv. Mater.</i> <b>35</b> , 2302625 (2023)               |
| CuCo <sub>2</sub> O <sub>4-x</sub> S <sub>x</sub> /NC-2 | 6.0                                   | 300 h                                | 10                                     | [47]<br><i>Adv. Mater.</i> <b>35</b> , 2370257 (2023)               |
| Cu-Co/NC                                                | 1.0                                   | 510 h                                | 10                                     | [48]<br><i>Adv. Mater.</i> <b>35</b> , 2300905 (2023)               |
| SA-Fe-SNC@900                                           | 2.0                                   | 160 h                                | 5                                      | [7]<br><i>Adv. Mater.</i> <b>35</b> , 2209948 (2023)                |
| T-Fe SAC                                                | 4.0                                   | 350 h                                | 20                                     | [49]<br><i>Angew. Chem. Int. Ed.</i> <b>136</b> , e202319370 (2024) |
| Fe-SA/N-HCS                                             | 1.0                                   | 400 h                                | 5                                      | [50]<br><i>Angew. Chem. Int. Ed.</i> <b>135</b> , e202309784 (2023) |
| ZnCo <sub>2</sub> O <sub>4-x</sub> F <sub>x</sub> /CNTs | 6.0                                   | 300 h                                | 5                                      | [51]<br><i>Angew. Chem. Int. Ed.</i> <b>62</b> , e202301408 (2023)  |

|                                                       |     |       |    |                                                                    |
|-------------------------------------------------------|-----|-------|----|--------------------------------------------------------------------|
| Pd-Gd <sub>2</sub> O <sub>3</sub> /C+RuO <sub>2</sub> | -   | 580 h | 5  | [42]<br><i>Angew. Chem. Int. Ed.</i> <b>62</b> , e202314565 (2023) |
| Fe <sub>x</sub> /FeN <sub>3</sub> S <sub>1</sub> -C   | 1.0 | 600 h | 5  | [23]<br><i>Energy Environ. Sci.</i> <b>17</b> , 4746-4757 (2024)   |
| Co-N-B-C                                              | 1.0 | 185 h | 5  | [12]<br><i>Energy Environ. Mater.</i> <b>7</b> , e12569 (2024)     |
| FeSA/N-PSCS                                           | 2.0 | 150 h | 10 | [22]<br><i>Energy Storage Mater.</i> <b>59</b> , 102790 (2023)     |

## Reference

- [1] Dai-Yi, Q. & Zi, G. XPS study of tungsten carbide. *Chin. J. Chem.* **8**, 301-305 (1990).
- [2] Zellner, M. B. & Chen, J. G. Surface science and electrochemical studies of WC and W<sub>2</sub>C PVD films as potential electrocatalysts. *Catal. Today* **99**, 299-307 (2005).
- [3] Nazon, J., Herbst, M., De Lucas, M. M., Bourgeois, S. & Domenichini, B. WC-based thin films obtained by reactive radio-frequency magnetron sputtering using W target and methane gas. *Thin Solid Films* **591**, 119-125 (2015).
- [4] Zhang, H. L., Wang, D. Z., & Huang, N. K. The effect of nitrogen ion implantation on tungsten surfaces. *Appl. Surf. Sci.* **150**, 34-38 (1999).
- [5] Martin, I., Vinatier, P., Levasseur, A., Dupin, J. C., & Gonbeau, D. XPS analysis of the lithium intercalation in amorphous tungsten oxysulfide thin films. *J. Power Sources* **81**, 306-311. (1999).
- [6] Li, H. et al. Superstructure-assisted single-atom catalysis on tungsten carbides for bifunctional oxygen reactions. *J. Am. Chem. Soc.* **146**, 9124-9133. (2024).
- [7] Chen, Z. et al. Mass production of sulfur-tuned single-atom catalysts for Zn-air batteries. *Adv. Mater.* **35**, 2209948. (2023).
- [8] ul Haq, M. et al. Derived-2D Nb<sub>4</sub>C<sub>3</sub>T<sub>x</sub> sheets with interfacial self-assembled Fe-NC single-atom catalyst for electrocatalysis in water splitting and durable zinc-air battery. *Appl. Catal. B Environ.* **344**, 123632 (2024).
- [9] Lyu, L. et al. Oxygen reduction kinetics of Fe-N-C single atom catalysts boosted by pyridinic N vacancy for temperature-adaptive Zn-Air batteries. *J. Am. Chem. Soc.* **146**, 4803-4813 (2024).
- [10] Liu, J., Chen, W., Yuan, S., Liu, T., & Wang, Q. High-coordination Fe-N<sub>4</sub>SP single-atom catalysts via the multi-shell synergistic effect for the enhanced oxygen reduction reaction of rechargeable Zn-air battery cathodes. *Energy & Environ. Sci.* **17**, 249-259 (2024).
- [11] Yang, X. et al. A vacuum vapor deposition strategy to Fe single-atom catalysts with densely active sites for high-performance Zn-air battery. *Adv. Sci.* **11**, 2306594 (2024).
- [12] Xu, C. et al. Boric acid-assisted pyrolysis for high-loading single-atom catalysts to boost oxygen reduction reaction in Zn-air batteries. *Energy & Environ. Mater.* **7**, e12569 (2024).
- [13] Liu, H. et al. Microporous hard carbon support provokes exceptional performance of single atom electrocatalysts for advanced air cathodes. *Angew. Chem. Int. Ed.* e202501307 (2025).
- [14] Liu, H. et al. Construction of single-atomic Fe and Cu sites within nitrogen/sulfur co-doped carbon matrix for boosting the performance of zinc-air batteries. *Appl. Catal. B Environ.* **362**, 124705 (2025).
- [15] Zhao, Y. X. et al. A “pre-division metal clusters” strategy to mediate efficient dual-active sites ORR catalyst for ultralong rechargeable Zn-air battery. *Angew. Chem. Int. Ed.* **62**, e202216950 (2023).
- [16] Zhang, L. et al. Coordination engineering and electronic structure modulation of FeNi dual-single-atoms encapsulated in N, P-codoped 3D hierarchically porous carbon electrocatalyst for synergistically boosting oxygen reduction reaction. *Appl. Catal. B Environ.* **351**, 123991 (2024).
- [17] Lei, X. et al. High-entropy single-atom activated carbon catalysts for sustainable oxygen electrocatalysis. *Nat. Sustain.* **6**, 816-826 (2023).
- [18] Yuan, Y. et al. Zirconium nitride catalysts surpass platinum for oxygen reduction. *Nat. Mater.* **19**, 282-286 (2020).
- [19] Jiang, Z. et al. Interfacial assembly of binary atomic metal-N<sub>x</sub> sites for high-performance energy devices. *Nat. Commun.* **14**, 1822 (2023).
- [20] Pei, Z. et al. Atomically dispersed Fe sites regulated by adjacent single Co atoms anchored on N-P co-doped carbon structures for highly efficient oxygen reduction reaction. *Adv. Mater.* **36**, 2306047 (2024).
- [21] Wu, Y. et al. Soft template-directed interlayer confinement synthesis of a Fe-Co dual single-atom catalyst for Zn-air batteries. *Energy Storage Mater.* **45**, 805-813 (2022).
- [22] Shen, M. et al. Breaking the N-limitation with N-enriched porous submicron carbon spheres anchored Fe single-atom catalyst for superior oxygen reduction reaction and Zn-air batteries. *Energy Storage Mater.* **59**, 102790 (2023).
- [23] Chen, J. et al. Wood-derived Fe cluster-reinforced asymmetric single-atom catalysts and weather-resistant organohydrogel for wide-temperature flexible Zn-air batteries. *Energy Environ. Sci.* **17**, 4746-4757 (2024).
- [24] Sun, K. et al. Co(CN)<sub>3</sub> catalysts with well-defined coordination structure for the oxygen reduction reaction. *Nat. Catal.* **6**, 1164-1173 (2023).
- [25] Shinde, S. S. et al. Ampere-hour-scale zinc-air pouch cells. *Nat. Energy* **6**, 592-604 (2021).

- [26] Cheng, W. et al. Lattice-strained metal–organic-framework arrays for bifunctional oxygen electrocatalysis. *Nat. Energy* **4**, 115-122 (2019).
- [27] Zhao, Y. et al. Few-layer graphdiyne doped with sp-hybridized nitrogen atoms at acetylenic sites for oxygen reduction electrocatalysis. *Nat. Chem.* **10**, 924-931 (2018).
- [28] Rao, P. et al. Movable type printing method to synthesize high-entropy single-atom catalysts. *Nat. Commun.* **13**, 5071 (2022).
- [29] Wang, Q. et al. Quasi-solid-state Zn-air batteries with an atomically dispersed cobalt electrocatalyst and organohydrogel electrolyte. *Nat. Commun.* **13**, 3689 (2022).
- [30] Zhou, Y. et al. Boosting oxygen electrocatalytic activity of Fe–N–C catalysts by phosphorus incorporation. *J. Am. Chem. Soc.* **145**, 3647-3655 (2023).
- [31] Zhao, Z. et al. Constructing unique mesoporous carbon superstructures via monomicelle interface confined assembly. *J. Am. Chem. Soc.* **144**, 11767-11777 (2022).
- [32] Jiang, Y. et al. Linker-compensated metal-organic framework with electron delocalized metal sites for bifunctional oxygen electrocatalysis. *J. Am. Chem. Soc.* **144**, 4783-4791 (2022).
- [33] Shahbazi Farahani, F. et al. Trilayer metal-organic frameworks as multifunctional electrocatalysts for energy conversion and storage applications. *J. Am. Chem. Soc.* **144**, 3411-3428 (2022).
- [34] Qin, J. et al. Altering ligand fields in single-atom sites through second-shell anion modulation boosts the oxygen reduction reaction. *J. Am. Chem. Soc.* **144**, 2197-2207 (2022).
- [35] Zhou, C. et al. Superdurable bifunctional oxygen electrocatalyst for high-performance zinc–air batteries. *J. Am. Chem. Soc.* **144**, 2694–2704 (2022).
- [36] Ji, B. et al. Coordination chemistry of large-sized yttrium single-atom catalysts for oxygen reduction reaction. *Adv. Mater.* **35**, 2300381 (2023).
- [37] Tian, H. et al. High durability of Fe–N–C single-atom catalysts with carbon vacancies toward the oxygen reduction reaction in alkaline media. *Adv. Mater.* **35**, 2210714 (2023).
- [38] Yao, W. et al. Hierarchically ordered macro–mesoporous electrocatalyst with hydrophilic surface for efficient oxygen reduction reaction. *Adv. Mater.* **35**, 2301894 (2023).
- [39] Huang, H. et al. Tailoring oxygen reduction reaction kinetics on perovskite oxides via oxygen vacancies for low-temperature and knittable zinc–air batteries. *Adv. Mater.* **35**, 2303109 (2023).
- [40] You, Z. et al. Metal-free carbon-based covalent organic frameworks with heteroatom-free units boost efficient oxygen reduction. *Adv. Mater.* **35**, 2209129 (2023).
- [41] Xie, Y. et al. Direct oxygen–oxygen cleavage through optimizing interatomic distances in dual single-atom electrocatalysts for efficient oxygen reduction reaction. *Angew. Chem. Int. Ed.* **135**, e202301833 (2023).
- [42] Ning, S. et al. Importing antibonding-orbital occupancy through Pd–O–Gd bridge promotes electrocatalytic oxygen reduction. *Angew. Chem. Int. Ed.* **62**, e202314565 (2023).
- [43] Tong, M. et al. Potential dominates structural recombination of single atom Mn sites for promoting oxygen reduction reaction. *Angew. Chem. Int. Ed.* **62**, e202314933 (2023).
- [44] Luo, M. et al. PdMo bimetallic for oxygen reduction catalysis. *Nature* **574**, 81-85 (2019).
- [45] Li, Y. et al. Main-group element-boosted oxygen electrocatalysis of Cu-N-C sites for zinc-air battery with cycling over 5000 h. *Nat. Commun.* **15**, 8365 (2024).
- [46] Balamurugan, J. et al. Electrocatalysts for zinc–air batteries featuring single molybdenum atoms in a nitrogen-doped carbon framework. *Adv. Mater.* **35**, 2302625 (2023).
- [47] Cai, J. et al. Hetero-anionic structure activated Co-S bonds promote oxygen electrocatalytic activity for high-efficiency zinc-air batteries. *Adv. Mater.* **35**, 2370257 (2023).
- [48] Li, Z. et al. Geometric and electronic engineering of atomically dispersed copper-cobalt diatomic sites for synergistic promotion of bifunctional oxygen electrocatalysis in zinc–air batteries. *Adv. Mater.* **35**, 2300905 (2023).
- [49] Zhu, Y. et al. Tip-like Fe-N<sub>4</sub> sites induced surface microenvironments regulation boosts the oxygen reduction reaction. *Angew. Chem. Int. Ed.* **136**, e202319370 (2024).
- [50] Zong, L. et al. Constructing Fe-N<sub>4</sub> sites through anion exchange-mediated transformation of Fe coordination environments in hierarchical carbon support for efficient oxygen reduction. *Angew. Chem. Int. Ed.* **135**, e202309784 (2023).

[51] Xiao, K., Wang, Y., Wu, P., Hou, L., & Liu, Z. Q. Activating lattice oxygen in spinel  $\text{ZnCo}_2\text{O}_4$  through filling oxygen vacancies with fluorine for electrocatalytic oxygen evolution. *Angew. Chem. Int. Ed.* **62**, e202301408 (2023).
